# Supplementary material for: Mechanistic insight into the selective cyclization of arylnitrones to indolines via Rh(iii) catalyst: a theoretical study
Source: Royal Society of Chemistry journal article supplement (doi:10.1039/c6ra01111j), 2016-01-01
Supplement: c6ra01111j1.pdf [file c6ra01111j1.pdf]

# Mechanistic insight into the selective cyclization of aryl nitrones to indolines via Rh(III) catalyst: a theoretical study

Tao Liu<sup>a</sup>, Xiao-Wen Zheng<sup>a</sup>, Ling-Li Han<sup>a</sup>, Ya-Ping Li<sup>b</sup>, Shu-Min Han<sup>b</sup> and Zhang-Yu Yu<sup>a,b,\*</sup>

<sup>a</sup> Department of Chemistry and Chemical Engineering, Jining University, Qufu 273155, Shandong, China

<sup>b</sup> School of Chemistry and Chemical Engineering, Qufu Normal University, Qufu 273165, Shandong, China

---

\* Corresponding author.  
E-mail address: zhy\_yu@126.com

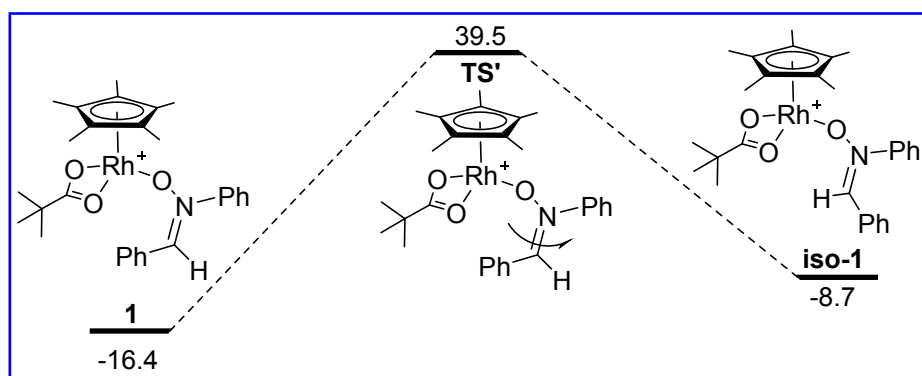

Fig. S1 The transformation from **1** to **iso-1**. Free energies (in kcal/mol) are relative to **cat-1**.

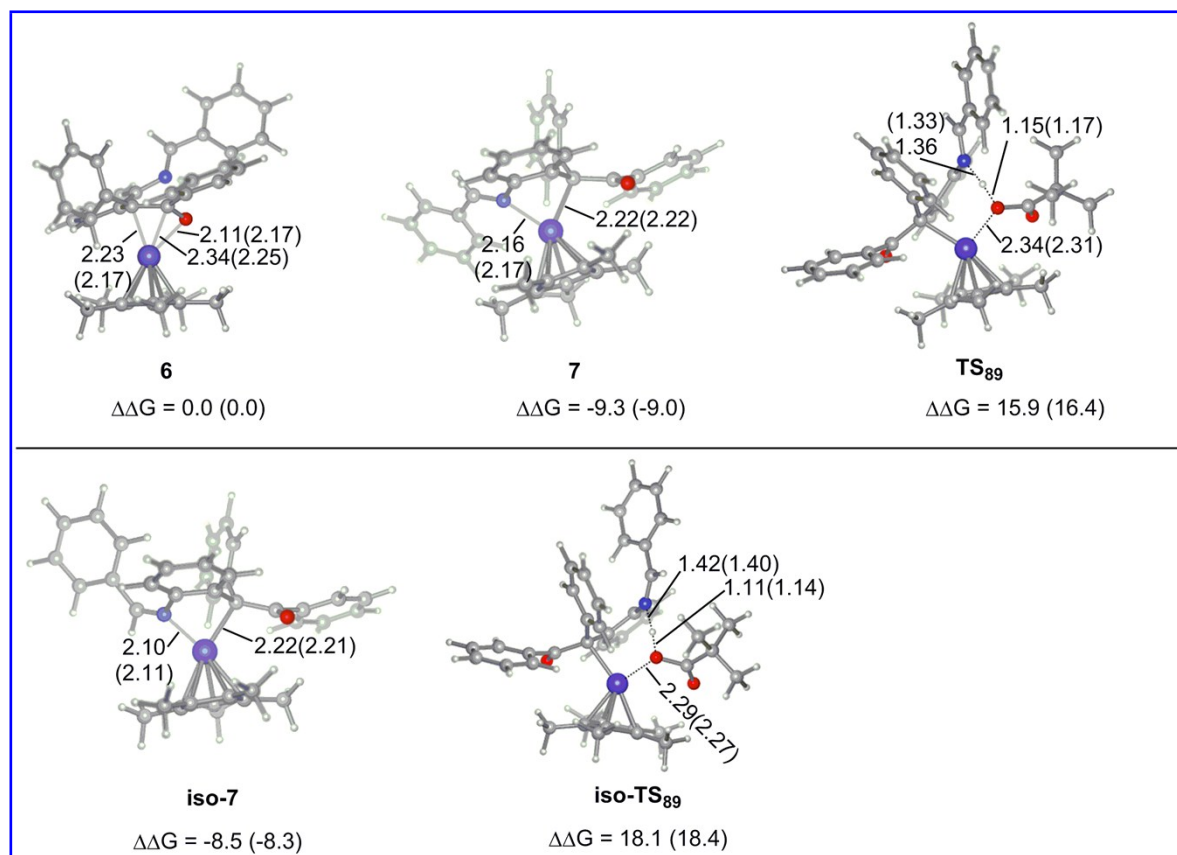

**Fig. S2** Comparing the key intermediates and transition states optimized in 1,4-dioxane and the gas phase, respectively. The values in parentheses are the ones in the gas phase. Bond distances are given in Å and relative free energies are given in kcal/mol.

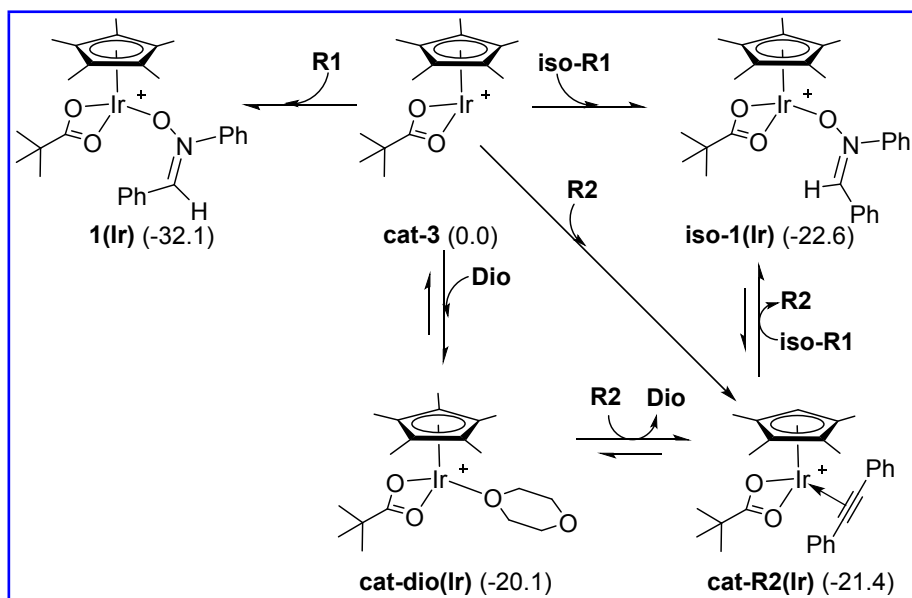

**Scheme S1** Possible isomers of the **cat-X** coordination and their relative stabilities. Values in parentheses are relative free energies in kcal/mol, where the energy of **cat-3** is set to be the zero reference energy point.

## Cartesian coordinates and Gibbs free energies for all of the calculated structures

|                                                          |          |          |          |                                                           |          |          |          |
|----------------------------------------------------------|----------|----------|----------|-----------------------------------------------------------|----------|----------|----------|
| <b>cat-1</b>                                             |          |          |          | H                                                         | 4.55489  | 0.7785   | 1.71646  |
| Sum of electronic and thermal Free Energies: -845.585615 |          |          |          | H                                                         | 4.54624  | -0.96678 | 1.63299  |
| Rh                                                       | 0.36172  | 0.00009  | -0.1722  | C                                                         | 4.83102  | 1.29956  | -0.92798 |
| C                                                        | -1.35365 | 1.18323  | 0.54371  | H                                                         | 5.8916   | 1.24514  | -1.05876 |
| C                                                        | -1.62955 | 0.73558  | -0.77869 | H                                                         | 4.36013  | 1.42452  | -1.88064 |
| C                                                        | -1.62951 | -0.73491 | -0.77939 | H                                                         | 4.59137  | 2.1319   | -0.29975 |
| C                                                        | -1.35358 | -1.18389 | 0.54258  | <b>RI</b>                                                 |          |          |          |
| C                                                        | -1.13108 | -0.00075 | 1.3662   | Sum of electronic and thermal Free Energies: -631.750702  |          |          |          |
| O                                                        | 2.16455  | -1.09224 | -0.1505  | C                                                         | -4.09565 | -0.75994 | 0.627    |
| C                                                        | 2.83926  | 0.00085  | -0.19669 | C                                                         | -2.74213 | -1.06363 | 0.49523  |
| O                                                        | 2.16441  | 1.09359  | -0.15076 | C                                                         | -1.88492 | -0.12609 | -0.08843 |
| C                                                        | 4.32723  | 0.00011  | -0.27284 | C                                                         | -2.371   | 1.08523  | -0.58394 |
| C                                                        | -0.84677 | -0.00142 | 2.82904  | C                                                         | -3.73073 | 1.3748   | -0.45534 |
| H                                                        | -0.2911  | 0.88633  | 3.13656  | C                                                         | -4.59194 | 0.46242  | 0.15911  |
| H                                                        | -1.8001  | -0.00176 | 3.37568  | H                                                         | -4.76118 | -1.47446 | 1.10183  |
| H                                                        | -0.29095 | -0.88937 | 3.13571  | H                                                         | -2.32687 | -2.00496 | 0.83008  |
| C                                                        | -1.2855  | 2.59779  | 1.02303  | H                                                         | -1.71025 | 1.77889  | -1.09317 |
| H                                                        | -1.07393 | 3.29121  | 0.20769  | H                                                         | -4.11695 | 2.3097   | -0.84763 |
| H                                                        | -2.24699 | 2.88379  | 1.46715  | H                                                         | -5.64976 | 0.69078  | 0.25811  |
| H                                                        | -0.51492 | 2.72813  | 1.78591  | C                                                         | 0.44801  | 0.45078  | -0.00392 |
| C                                                        | -1.90653 | 1.58983  | -1.97162 | C                                                         | 1.88143  | 0.2521   | 0.00214  |
| H                                                        | -1.5024  | 1.15178  | -2.88718 | C                                                         | 2.52591  | -0.96416 | -0.31867 |
| H                                                        | -2.99164 | 1.68703  | -2.10686 | C                                                         | 2.67927  | 1.35984  | 0.371    |
| H                                                        | -1.49331 | 2.59323  | -1.85823 | C                                                         | 3.9155   | -1.05087 | -0.26909 |
| C                                                        | -1.90645 | -1.58805 | -1.9731  | H                                                         | 1.92112  | -1.81416 | -0.59799 |
| H                                                        | -1.4914  | -2.59091 | -1.86154 | C                                                         | 4.06451  | 1.259    | 0.42899  |
| H                                                        | -2.99157 | -1.68694 | -2.10708 | H                                                         | 2.19602  | 2.30021  | 0.62238  |
| H                                                        | -1.50426 | -1.14807 | -2.88858 | C                                                         | 4.69112  | 0.04965  | 0.10885  |
| C                                                        | -1.2855  | -2.59897 | 1.02042  | H                                                         | 4.39793  | -1.99148 | -0.52265 |
| H                                                        | -2.24724 | -2.88565 | 1.46354  | H                                                         | 4.65562  | 2.11656  | 0.7286   |
| H                                                        | -1.07322 | -3.29145 | 0.20446  | H                                                         | 5.77199  | -0.03541 | 0.15754  |
| H                                                        | -0.51544 | -2.72998 | 1.78369  | N                                                         | -0.47321 | -0.4875  | -0.16636 |
| C                                                        | 4.82082  | -1.23983 | -1.04128 | O                                                         | -0.2332  | -1.73558 | -0.31149 |
| H                                                        | 5.86763  | -1.14268 | -1.24044 | H                                                         | 0.06412  | 1.44678  | 0.18173  |
| H                                                        | 4.64975  | -2.11625 | -0.45176 | <b>I</b>                                                  |          |          |          |
| H                                                        | 4.28804  | -1.3221  | -1.96555 | Sum of electronic and thermal Free Energies: -1477.362111 |          |          |          |
| C                                                        | 4.88981  | -0.07116 | 1.15895  | Rh                                                        | -1.29705 | -1.3164  | 3.19518  |
| H                                                        | 5.95917  | -0.0747  | 1.12222  | C                                                         | -1.90835 | -1.71695 | 5.25004  |

|   |          |          |         |
|---|----------|----------|---------|
| C | -2.64872 | -0.56717 | 4.74715 |
| C | -3.4575  | -1.01202 | 3.64805 |
| C | -3.1915  | -2.41128 | 3.42232 |
| C | -2.25123 | -2.84965 | 4.43936 |
| O | 0.41642  | -2.42582 | 2.41838 |
| C | 1.22172  | -1.53006 | 2.84512 |
| O | 0.7203   | -0.57133 | 3.52785 |
| C | 2.71377  | -1.57164 | 2.53977 |
| C | -1.74793 | -4.24878 | 4.59695 |
| H | -0.81892 | -4.28474 | 5.16752 |
| H | -2.49416 | -4.85142 | 5.12942 |
| H | -1.56786 | -4.71862 | 3.62748 |
| C | -0.99094 | -1.70061 | 6.43184 |
| H | -0.38389 | -0.79279 | 6.45132 |
| H | -1.57611 | -1.73566 | 7.35892 |
| H | -0.31451 | -2.55684 | 6.43032 |
| C | -2.63036 | 0.80511  | 5.34441 |
| H | -2.83565 | 1.57529  | 4.59803 |
| H | -3.39328 | 0.88486  | 6.12906 |
| H | -1.66261 | 1.02683  | 5.79928 |
| C | -4.42847 | -0.1687  | 2.88426 |
| H | -4.59621 | -0.55806 | 1.87851 |
| H | -5.39516 | -0.16539 | 3.40301 |
| H | -4.0931  | 0.86803  | 2.80732 |
| C | -3.8666  | -3.30132 | 2.42575 |
| H | -4.76045 | -3.7556  | 2.87182 |
| H | -4.17811 | -2.75294 | 1.53509 |
| H | -3.20787 | -4.11116 | 2.10552 |
| C | 3.09221  | -2.90907 | 1.88303 |
| H | 4.16549  | -2.92195 | 1.66969 |
| H | 2.86614  | -3.75495 | 2.53866 |
| H | 2.55455  | -3.06009 | 0.94356 |
| C | 3.49102  | -1.37879 | 3.86038 |
| H | 4.56563  | -1.35652 | 3.65465 |
| H | 3.21345  | -0.44213 | 4.34959 |
| H | 3.30175  | -2.20212 | 4.55748 |
| C | 3.01983  | -0.39713 | 1.57915 |
| H | 4.08667  | -0.39222 | 1.33552 |
| H | 2.45942  | -0.49334 | 0.64352 |
| H | 2.76548  | 0.56246  | 2.03643 |
| C | 0.2161   | 3.74612  | 2.19053 |
| C | -0.07835 | 2.43078  | 1.83195 |
| C | -1.35463 | 2.12805  | 1.34247 |
| C | -2.34273 | 3.11106  | 1.23792 |

|   |          |          |          |
|---|----------|----------|----------|
| C | -2.03073 | 4.42057  | 1.60247  |
| C | -0.75545 | 4.74315  | 2.07239  |
| H | 1.20396  | 3.98703  | 2.56988  |
| H | 0.67456  | 1.65902  | 1.95316  |
| H | -3.33103 | 2.84027  | 0.887    |
| H | -2.78912 | 5.19171  | 1.51158  |
| H | -0.51981 | 5.76515  | 2.35143  |
| C | -2.78687 | 0.51317  | 0.24415  |
| C | -3.24284 | -0.76296 | -0.25054 |
| C | -2.6306  | -2.01406 | 0.00806  |
| C | -4.40769 | -0.72399 | -1.05534 |
| C | -3.17231 | -3.17076 | -0.54477 |
| H | -1.76334 | -2.06481 | 0.65101  |
| C | -4.93524 | -1.88625 | -1.60064 |
| H | -4.89237 | 0.22917  | -1.24959 |
| C | -4.31563 | -3.11445 | -1.34756 |
| H | -2.70512 | -4.12819 | -0.33597 |
| H | -5.82776 | -1.83976 | -2.21606 |
| H | -4.72974 | -4.02618 | -1.76727 |
| N | -1.70021 | 0.78202  | 0.93233  |
| O | -0.93339 | -0.19448 | 1.39724  |
| H | -3.41218 | 1.37533  | 0.04523  |
| H | 4.64975  | -2.11625 | -0.45176 |

#### Dio

Sum of electronic and thermal Free Energies: -307.559278

|   |          |         |          |
|---|----------|---------|----------|
| C | 0.95098  | 1.15686 | 0.       |
| C | 3.04368  | 2.36461 | 0.       |
| C | 2.34602  | 3.57312 | -0.0012  |
| C | 0.2536   | 2.36484 | -0.00068 |
| H | 0.63479  | 0.60873 | -0.86283 |
| H | 3.67531  | 2.36498 | 0.86368  |
| H | 2.6625   | 4.12009 | -0.86466 |
| H | -0.37858 | 2.36546 | 0.86259  |
| O | 0.9512   | 3.57304 | -0.00168 |
| O | 2.34614  | 1.15686 | 0.       |
| H | -0.37897 | 2.36426 | -0.86367 |
| H | 0.63479  | 0.6097  | 0.86344  |
| H | 3.67679  | 2.36412 | -0.8626  |
| H | 2.66191  | 4.12146 | 0.86161  |

#### cat-dio

Sum of electronic and thermal Free Energies: -1293.108527

|   |            |             |             |
|---|------------|-------------|-------------|
| C | 2.26419300 | -0.33590700 | -0.19538100 |
| C | 2.97291900 | 0.75493500  | 0.23157500  |

|    |             |             |             |                                                           |             |             |             |
|----|-------------|-------------|-------------|-----------------------------------------------------------|-------------|-------------|-------------|
| C  | 4.43655100  | -0.90368600 | -0.39760900 | H                                                         | 0.45671700  | -0.83671500 | -1.21978300 |
| C  | 5.65184200  | -1.54595500 | -0.64749100 | C                                                         | 0.28543100  | -1.51011100 | 0.83490800  |
| C  | 6.82023700  | -0.83996400 | -0.37832200 | H                                                         | 1.02773900  | -2.31731600 | 0.88017400  |
| C  | 6.77843800  | 0.47312500  | 0.13009300  | H                                                         | 0.30387900  | -1.03718000 | 1.82444200  |
| C  | 5.56723400  | 1.10925700  | 0.37576300  | C                                                         | -4.01849000 | 5.13139400  | 0.15431100  |
| C  | 4.36947900  | 0.42532300  | 0.10966400  | H                                                         | -4.48597600 | 4.72398400  | 1.05188800  |
| H  | 5.68575600  | -2.55970500 | -1.03697700 | C                                                         | -4.49620600 | 6.48042900  | -0.28993800 |
| H  | 7.78116700  | -1.31128600 | -0.56215100 | H                                                         | -4.33838900 | 7.23591300  | 0.49084300  |
| H  | 7.70979000  | 0.99447600  | 0.33068400  | H                                                         | -3.97737700 | 6.81400600  | -1.19353700 |
| H  | 5.54683800  | 2.12342400  | 0.76499000  | H                                                         | -5.57374000 | 6.47274200  | -0.50001600 |
| N  | 3.13721100  | -1.35183900 | -0.55754600 | <b>R2</b>                                                 |             |             |             |
| H  | 2.87387400  | -2.21771500 | -0.99944700 | Sum of electronic and thermal Free Energies: -539.313540  |             |             |             |
| N  | 0.21841500  | 0.89701900  | -0.10493600 | C                                                         | -2.60674    | 0.00044     | -0.00054    |
| C  | -1.24098100 | 0.98971500  | -0.19882000 | C                                                         | -1.39431    | 0.00058     | -0.00058    |
| H  | -1.56001100 | 0.25342900  | -0.94829800 | C                                                         | 0.03531     | 0.00034     | -0.00028    |
| H  | -1.75604400 | 0.71177000  | 0.73758300  | C                                                         | 0.75329     | 1.212       | -0.0001     |
| C  | -1.68210800 | 2.35952200  | -0.63408100 | C                                                         | 0.7526      | -1.21171    | -0.00011    |
| H  | -1.19435600 | 2.74617400  | -1.52890900 | C                                                         | 2.14563     | 1.20738     | 0.00014     |
| C  | -2.62068200 | 3.09519800  | -0.01549400 | H                                                         | 0.20616     | 2.14917     | -0.00012    |
| H  | -3.09174300 | 2.69919600  | 0.88559300  | C                                                         | 2.14496     | -1.20787    | 0.00015     |
| C  | -3.07402100 | 4.40285000  | -0.46320700 | H                                                         | 0.2049      | -2.14855    | -0.00012    |
| H  | -2.60184600 | 4.80078000  | -1.36236700 | C                                                         | 2.84683     | -0.00045    | 0.00026     |
| C  | 2.28161100  | 2.00083600  | 0.69602600  | H                                                         | 2.68563     | 2.14982     | 0.00027     |
| H  | 2.75235200  | 2.40754200  | 1.60027000  | H                                                         | 2.68441     | -2.15062    | 0.00028     |
| H  | 2.34214900  | 2.78430500  | -0.07176800 | H                                                         | 3.9328      | -0.00075    | 0.00049     |
| C  | 0.80592000  | 1.68274100  | 0.98501600  | C                                                         | -4.14674    | -0.00027    | 0.00049     |
| H  | 0.72631000  | 1.16650300  | 1.96076900  | C                                                         | -4.84375    | -1.20667    | -0.07182    |
| H  | 0.23124300  | 2.60837000  | 1.07036000  | C                                                         | -4.84475    | 1.20511     | 0.07383     |
| C  | -1.02463600 | -2.09896700 | 0.57620900  | C                                                         | -6.23846    | -1.20756    | -0.07147    |
| C  | -2.10369400 | -2.61449400 | 0.33762700  | H                                                         | -4.29316    | -2.15676    | -0.13041    |
| Si | -3.73418200 | -3.39428400 | -0.00228700 | C                                                         | -6.23989    | 1.20434     | 0.07519     |
| C  | -4.89079900 | -3.05495300 | 1.45287800  | H                                                         | -4.29556    | 2.15603     | 0.13101     |
| H  | -4.49170700 | -3.47334700 | 2.38248200  | C                                                         | -6.9368     | -0.00171    | 0.00241     |
| H  | -5.03327100 | -1.98019400 | 1.60460700  | H                                                         | -6.78793    | -2.15839    | -0.1291     |
| H  | -5.87614500 | -3.50238600 | 1.27954800  | H                                                         | -6.78997    | 2.15486     | 0.13344     |
| C  | -4.44929000 | -2.65241300 | -1.58657700 | H                                                         | -8.03648    | -0.00266    | 0.00273     |
| H  | -3.78730300 | -2.82597600 | -2.44115100 | <b>cat-R2</b>                                             |             |             |             |
| H  | -5.42190700 | -3.09981600 | -1.82128300 | Sum of electronic and thermal Free Energies: -1384.905948 |             |             |             |
| H  | -4.59377900 | -1.57148400 | -1.49004800 | Rh                                                        | 0.02858     | 0.42626     | 0.67633     |
| C  | -3.49053200 | -5.25651200 | -0.21391100 | C                                                         | 1.29421     | 0.84443     | 2.46109     |
| H  | -2.81719400 | -5.47771700 | -1.04834700 | C                                                         | 0.05106     | 1.58036     | 2.53767     |
| H  | -3.06310600 | -5.70578500 | 0.68828400  | C                                                         | -1.02522    | 0.60867     | 2.6177      |
| H  | -4.44652400 | -5.75341200 | -0.41472300 | C                                                         | -0.45307    | -0.70418    | 2.53688     |
| C  | 0.76788000  | -0.45384000 | -0.23729100 | C                                                         | 0.98891     | -0.5585     | 2.43052     |

|   |          |          |          |                                                          |          |          |          |
|---|----------|----------|----------|----------------------------------------------------------|----------|----------|----------|
| O | -1.21337 | 1.61174  | -0.65158 | C                                                        | -4.61865 | -2.73596 | -1.21794 |
| C | -0.18986 | 2.08313  | -1.25454 | H                                                        | -3.7487  | -4.71408 | -1.12779 |
| O | 0.94637  | 1.71375  | -0.80787 | H                                                        | -5.18578 | -0.65645 | -1.28322 |
| C | -0.30865 | 3.03538  | -2.43417 | H                                                        | -5.63315 | -3.10079 | -1.3452  |
| C | 1.99368  | -1.66758 | 2.4351   | C                                                        | 0.6124   | -1.31311 | -0.82355 |
| H | 2.84056  | -1.45006 | 1.78197  | C                                                        | 1.9833   | -1.64351 | -1.11098 |
| H | 2.38059  | -1.80619 | 3.452    | C                                                        | 2.28357  | -2.99854 | -1.36847 |
| H | 1.55614  | -2.61304 | 2.1128   | C                                                        | 3.01647  | -0.68738 | -1.15264 |
| C | 2.665    | 1.43698  | 2.40544  | C                                                        | 3.58709  | -3.38305 | -1.66732 |
| H | 2.6542   | 2.44584  | 1.9889   | H                                                        | 1.4905   | -3.73814 | -1.34082 |
| H | 3.07818  | 1.49672  | 3.42128  | C                                                        | 4.31764  | -1.08673 | -1.4513  |
| H | 3.34306  | 0.82242  | 1.80853  | H                                                        | 2.78602  | 0.35682  | -0.9732  |
| C | -0.09033 | 3.06551  | 2.66365  | C                                                        | 4.60811  | -2.42987 | -1.70814 |
| H | -1.04399 | 3.4124   | 2.26007  | H                                                        | 3.80554  | -4.42781 | -1.86917 |
| H | -0.04568 | 3.36085  | 3.71893  | H                                                        | 5.1087   | -0.34296 | -1.49287 |
| H | 0.70921  | 3.59002  | 2.1372   | H                                                        | 5.62364  | -2.73276 | -1.94262 |
| C | -2.47902 | 0.92548  | 2.75557  | <b>iso-R1</b>                                            |          |          |          |
| H | -3.1021  | 0.16962  | 2.27323  | Sum of electronic and thermal Free Energies: -631.738491 |          |          |          |
| H | -2.75016 | 0.9561   | 3.81841  | C                                                        | -4.14014 | -0.77176 | 0.48656  |
| H | -2.72221 | 1.8969   | 2.32123  | C                                                        | -2.7842  | -1.08343 | 0.4208   |
| C | -1.1929  | -1.99872 | 2.65642  | C                                                        | -1.88525 | -0.12222 | -0.0427  |
| H | -1.23288 | -2.30155 | 3.71045  | C                                                        | -2.33026 | 1.12726  | -0.47962 |
| H | -2.21819 | -1.9168  | 2.29169  | C                                                        | -3.69189 | 1.42568  | -0.41407 |
| H | -0.69996 | -2.79797 | 2.10059  | C                                                        | -4.59777 | 0.48255  | 0.07394  |
| C | -1.78727 | 3.29334  | -2.7723  | H                                                        | -4.84205 | -1.5127  | 0.8573   |
| H | -1.85171 | 3.9773   | -3.62448 | H                                                        | -2.39929 | -2.05317 | 0.7111   |
| H | -2.30419 | 2.36769  | -3.04105 | H                                                        | -1.63451 | 1.84695  | -0.89686 |
| H | -2.32024 | 3.7483   | -1.93201 | H                                                        | -4.04355 | 2.39251  | -0.76139 |
| C | 0.41905  | 2.39571  | -3.64024 | H                                                        | -5.65659 | 0.71888  | 0.12001  |
| H | 0.35999  | 3.07091  | -4.49951 | C                                                        | 0.45173  | 0.41971  | 0.11922  |
| H | 1.47253  | 2.2146   | -3.41475 | C                                                        | 0.75949  | 1.80775  | 0.38592  |
| H | -0.04377 | 1.44577  | -3.92669 | C                                                        | -0.20275 | 2.83065  | 0.54032  |
| C | 0.39227  | 4.3597   | -2.04434 | C                                                        | 2.12702  | 2.14717  | 0.50138  |
| H | 0.36225  | 5.04983  | -2.89311 | C                                                        | 0.20564  | 4.13642  | 0.80422  |
| H | -0.11233 | 4.84623  | -1.20183 | H                                                        | -1.24897 | 2.57574  | 0.4488   |
| H | 1.4387   | 4.19201  | -1.77467 | C                                                        | 2.52195  | 3.45337  | 0.76201  |
| C | -0.62666 | -1.37628 | -0.7815  | H                                                        | 2.879    | 1.37039  | 0.38446  |
| C | -1.99643 | -1.79226 | -0.90254 | C                                                        | 1.56016  | 4.45692  | 0.91556  |
| C | -2.2574  | -3.18107 | -0.93153 | H                                                        | -0.54513 | 4.91284  | 0.92196  |
| C | -3.0679  | -0.88385 | -1.02937 | H                                                        | 3.57845  | 3.69124  | 0.84646  |
| C | -3.55932 | -3.644   | -1.09487 | H                                                        | 1.86619  | 5.47906  | 1.11912  |
| H | -1.43702 | -3.88301 | -0.84262 | N                                                        | -0.47637 | -0.50128 | -0.08951 |
| C | -4.36709 | -1.36168 | -1.18277 | O                                                        | -0.24797 | -1.74269 | -0.30595 |
| H | -2.86589 | 0.18129  | -1.01995 | H                                                        | 1.4713   | 0.06121  | 0.07935  |



|                                                           |          |          |          |                                                           |          |          |          |
|-----------------------------------------------------------|----------|----------|----------|-----------------------------------------------------------|----------|----------|----------|
| <b>iso-1</b>                                              |          |          |          | C                                                         | 3.10489  | -1.07015 | 2.86741  |
| Sum of electronic and thermal Free Energies: -1477.351021 |          |          |          | C                                                         | 2.93473  | -0.79592 | 1.51138  |
| Rh                                                        | -0.44959 | 2.56244  | -0.96485 | C                                                         | 1.87209  | 0.02332  | 1.11356  |
| C                                                         | -0.88226 | 4.60082  | -0.30488 | C                                                         | 0.96466  | 0.54237  | 2.03907  |
| C                                                         | 0.42634  | 4.19822  | 0.18653  | C                                                         | 1.15175  | 0.26165  | 3.39327  |
| C                                                         | 1.27588  | 3.98147  | -0.95816 | C                                                         | 2.2194   | -0.53647 | 3.80987  |
| C                                                         | 0.49384  | 4.16892  | -2.1458  | H                                                         | 3.92839  | -1.70091 | 3.18681  |
| C                                                         | -0.84679 | 4.57012  | -1.73708 | H                                                         | 3.62195  | -1.20071 | 0.77693  |
| O                                                         | -1.91016 | 1.38231  | -2.11148 | H                                                         | 0.12172  | 1.1288   | 1.6953   |
| C                                                         | -2.48404 | 1.02466  | -1.02797 | H                                                         | 0.4584   | 0.66961  | 4.12172  |
| O                                                         | -2.05297 | 1.54005  | 0.05964  | H                                                         | 2.36009  | -0.74861 | 4.86509  |
| C                                                         | -3.61827 | 0.00757  | -1.0063  | C                                                         | 2.58989  | 0.37467  | -1.21596 |
| C                                                         | -1.96172 | 4.91587  | -2.67248 | C                                                         | 4.03708  | 0.45492  | -1.10089 |
| H                                                         | -2.93464 | 4.85018  | -2.1831  | C                                                         | 4.73047  | 0.96167  | 0.01922  |
| H                                                         | -1.8371  | 5.94201  | -3.0396  | C                                                         | 4.77247  | 0.08958  | -2.2486  |
| H                                                         | -1.97428 | 4.24842  | -3.53703 | C                                                         | 6.11577  | 1.06916  | -0.00985 |
| C                                                         | -2.0443  | 4.97592  | 0.55847  | H                                                         | 4.1874   | 1.29536  | 0.89511  |
| H                                                         | -2.1189  | 4.32312  | 1.43106  | C                                                         | 6.16049  | 0.1818   | -2.26233 |
| H                                                         | -1.92065 | 6.00531  | 0.9168   | H                                                         | 4.24634  | -0.27002 | -3.12865 |
| H                                                         | -2.98866 | 4.92098  | 0.01508  | C                                                         | 6.83565  | 0.66994  | -1.14165 |
| C                                                         | 0.83906  | 4.15911  | 1.62489  | H                                                         | 6.63892  | 1.47495  | 0.85017  |
| H                                                         | 1.68764  | 3.49033  | 1.7831   | H                                                         | 6.71291  | -0.1135  | -3.14844 |
| H                                                         | 1.13646  | 5.16012  | 1.96202  | H                                                         | 7.91777  | 0.75488  | -1.15349 |
| H                                                         | 0.02058  | 3.8226   | 2.2653   | N                                                         | 1.66254  | 0.31179  | -0.28825 |
| C                                                         | 2.73275  | 3.6485   | -0.90139 | O                                                         | 0.41953  | 0.62423  | -0.66066 |
| H                                                         | 3.07426  | 3.17114  | -1.82047 | H                                                         | 2.1582   | 0.44681  | -2.21009 |
| H                                                         | 3.31147  | 4.57086  | -0.76767 | <b>TS<sub>12</sub></b>                                    |          |          |          |
| H                                                         | 2.96663  | 2.99258  | -0.05924 | Sum of electronic and thermal Free Energies: -1477.332244 |          |          |          |
| C                                                         | 0.97779  | 4.09043  | -3.5597  | Rh                                                        | -0.89889 | -0.38906 | -0.401   |
| H                                                         | 1.32496  | 5.07647  | -3.89367 | C                                                         | -1.54717 | -0.64878 | -2.47495 |
| H                                                         | 1.80624  | 3.38823  | -3.66658 | C                                                         | -0.5772  | -1.6819  | -2.19141 |
| H                                                         | 0.18097  | 3.77417  | -4.23613 | C                                                         | -1.08024 | -2.49698 | -1.1222  |
| C                                                         | -4.04507 | -0.35927 | -2.43665 | C                                                         | -2.40539 | -2.00046 | -0.78292 |
| H                                                         | -4.86607 | -1.08196 | -2.39982 | C                                                         | -2.69102 | -0.86512 | -1.61069 |
| H                                                         | -4.38934 | 0.5187   | -2.99062 | O                                                         | -1.34623 | 1.67378  | -0.24054 |
| H                                                         | -3.22211 | -0.80856 | -2.99916 | C                                                         | -1.26408 | 2.34963  | 0.85368  |
| C                                                         | -4.80571 | 0.6206   | -0.23047 | O                                                         | -0.85131 | 1.87776  | 1.93599  |
| H                                                         | -5.61762 | -0.11002 | -0.16352 | C                                                         | -1.77863 | 3.80822  | 0.83382  |
| H                                                         | -4.5104  | 0.90342  | 0.78266  | C                                                         | -3.93555 | -0.03711 | -1.65649 |
| H                                                         | -5.19694 | 1.50877  | -0.73837 | H                                                         | -3.67003 | 1.02627  | -1.58984 |
| C                                                         | -3.10241 | -1.24569 | -0.25992 | H                                                         | -4.46288 | -0.19699 | -2.61025 |
| H                                                         | -3.89522 | -1.99899 | -0.21747 | H                                                         | -4.62468 | -0.2717  | -0.84031 |
| H                                                         | -2.24267 | -1.68792 | -0.77416 | C                                                         | -1.4607  | 0.37795  | -3.57027 |
| H                                                         | -2.80192 | -0.99874 | 0.76122  | H                                                         | -0.42993 | 0.57033  | -3.85385 |

|   |          |          |          |                                                           |          |          |          |
|---|----------|----------|----------|-----------------------------------------------------------|----------|----------|----------|
| H | -2.02513 | 0.03411  | -4.4701  | H                                                         | 5.6329   | -0.5066  | 1.45389  |
| H | -1.8953  | 1.33117  | -3.24792 | C                                                         | 6.15136  | 1.28287  | -1.37854 |
| C | 0.74317  | -1.81812 | -2.88314 | H                                                         | 4.60278  | 2.09294  | -2.64293 |
| H | 1.24491  | -2.74786 | -2.61855 | H                                                         | 7.47338  | 0.37439  | 0.06747  |
| H | 0.60093  | -1.80568 | -3.96693 | H                                                         | 6.95875  | 1.67847  | -1.98377 |
| H | 1.40591  | -0.98989 | -2.61915 | N                                                         | 1.77651  | -0.41821 | 0.88766  |
| C | -0.44382 | -3.7378  | -0.57049 | O                                                         | 1.17038  | 0.13028  | -0.16431 |
| H | -0.59436 | -3.82685 | 0.50701  | H                                                         | 3.4245   | -0.74506 | 1.99136  |
| H | -0.87712 | -4.62801 | -1.04237 | <b>2</b>                                                  |          |          |          |
| H | 0.63094  | -3.75385 | -0.75912 | Sum of electronic and thermal Free Energies: -1477.354857 |          |          |          |
| C | -3.33906 | -2.65951 | 0.18301  | C                                                         | -0.68064 | -0.73951 | 2.13201  |
| H | -3.93804 | -3.4052  | -0.35298 | C                                                         | -1.09597 | -0.9281  | 3.4545   |
| H | -2.79982 | -3.17989 | 0.974    | H                                                         | -2.12377 | -1.17056 | 3.70158  |
| H | -4.03116 | -1.95093 | 0.64273  | C                                                         | -0.15878 | -0.82803 | 4.48006  |
| C | -1.90038 | 4.34016  | -0.60486 | C                                                         | 1.17565  | -0.54933 | 4.18011  |
| H | -2.20162 | 5.39044  | -0.58751 | H                                                         | 1.90492  | -0.45853 | 4.97951  |
| H | -0.94599 | 4.27095  | -1.13707 | C                                                         | 1.57969  | -0.40513 | 2.84867  |
| H | -2.64413 | 3.78442  | -1.17825 | C                                                         | 0.66868  | -0.51051 | 1.78553  |
| C | -0.82482 | 4.70502  | 1.65957  | H                                                         | 0.78744  | 1.60937  | 1.74748  |
| H | -1.19541 | 5.73331  | 1.69996  | H                                                         | 2.62647  | -0.2059  | 2.64095  |
| H | -0.71438 | 4.32305  | 2.68151  | C                                                         | 2.18141  | -0.63109 | -2.25109 |
| H | 0.17558  | 4.73056  | 1.20519  | C                                                         | 3.07896  | -0.45125 | -1.09927 |
| C | -3.16615 | 3.76849  | 1.52076  | C                                                         | 2.97501  | -1.60478 | -0.26389 |
| H | -3.63021 | 4.76197  | 1.45695  | C                                                         | 1.88687  | -2.40785 | -0.77788 |
| H | -3.83868 | 3.06652  | 1.0287   | C                                                         | 1.46993  | -1.82575 | -2.06263 |
| H | -3.09488 | 3.47757  | 2.57454  | O                                                         | 0.52764  | 1.69309  | -0.54553 |
| C | 0.50978  | -2.8907  | 3.38094  | C                                                         | 0.44156  | 2.66165  | 0.21826  |
| C | 1.39944  | -2.22376 | 2.54085  | O                                                         | 0.61472  | 2.55114  | 1.52705  |
| C | 0.92507  | -1.14488 | 1.7997   | C                                                         | 0.1149   | 4.07549  | -0.2521  |
| C | -0.42404 | -0.73798 | 1.85358  | Rh                                                        | 1.03518  | -0.50454 | -0.22887 |
| C | -1.28595 | -1.43719 | 2.71472  | H                                                         | -0.47306 | -0.97283 | 5.50822  |
| C | -0.82844 | -2.50599 | 3.4777   | C                                                         | 1.46142  | -3.75184 | -0.27079 |
| H | 0.88165  | -3.72777 | 3.97371  | H                                                         | 0.3996   | -3.92851 | -0.45828 |
| H | 2.42965  | -2.5637  | 2.46076  | H                                                         | 2.02561  | -4.54592 | -0.7764  |
| H | -0.66302 | 0.43213  | 1.72314  | H                                                         | 1.63631  | -3.8499  | 0.80268  |
| H | -2.3162  | -1.10528 | 2.8079   | C                                                         | 0.41141  | -2.41889 | -2.93944 |
| H | -1.50122 | -3.03303 | 4.14604  | H                                                         | 0.76101  | -3.36364 | -3.37223 |
| C | 3.07284  | -0.30993 | 1.06477  | H                                                         | -0.49419 | -2.63535 | -2.36433 |
| C | 4.05664  | 0.27418  | 0.188    | H                                                         | 0.14209  | -1.7522  | -3.76037 |
| C | 3.77514  | 1.01763  | -0.98358 | C                                                         | 3.86942  | -1.97158 | 0.87851  |
| C | 5.40704  | 0.05988  | 0.55606  | H                                                         | 3.32795  | -2.4814  | 1.67751  |
| C | 4.82238  | 1.51463  | -1.75026 | H                                                         | 4.65055  | -2.65323 | 0.51937  |
| H | 2.74673  | 1.2085   | -1.25916 | H                                                         | 4.37151  | -1.09973 | 1.30312  |
| C | 6.44271  | 0.55286  | -0.22276 | C                                                         | 4.06789  | 0.66689  | -0.9727  |

|                                                           |          |          |          |    |          |          |          |
|-----------------------------------------------------------|----------|----------|----------|----|----------|----------|----------|
| H                                                         | 4.43745  | 0.77051  | 0.04959  | H  | 2.93443  | 2.16396  | -0.08588 |
| H                                                         | 4.93304  | 0.48545  | -1.62292 | C  | 1.53579  | -1.64008 | 2.23728  |
| H                                                         | 3.62599  | 1.62007  | -1.27351 | C  | 2.4424   | -0.4942  | 2.09445  |
| C                                                         | 2.05922  | 0.34899  | -3.37656 | C  | 1.79397  | 0.65448  | 2.65894  |
| H                                                         | 1.28402  | 0.05454  | -4.08584 | C  | 0.44849  | 0.271    | 2.97209  |
| H                                                         | 1.80875  | 1.3458   | -3.0007  | C  | 0.32241  | -1.17751 | 2.76853  |
| H                                                         | 3.00531  | 0.42644  | -3.92486 | Rh | 0.67823  | 0.02685  | 0.78232  |
| N                                                         | -1.60325 | -0.76701 | 1.02368  | H  | 0.63812  | 5.37459  | -1.77644 |
| O                                                         | -1.03841 | -0.84689 | -0.18281 | C  | -0.60406 | 1.12648  | 3.6057   |
| C                                                         | -1.25012 | 4.47063  | 0.36585  | H  | -1.5875  | 0.92071  | 3.17493  |
| H                                                         | -1.21456 | 4.4519   | 1.45798  | H  | -0.66044 | 0.92336  | 4.68252  |
| H                                                         | -1.50727 | 5.48519  | 0.04803  | H  | -0.39176 | 2.18951  | 3.4772   |
| H                                                         | -2.04874 | 3.80099  | 0.02906  | C  | -0.90002 | -1.96794 | 3.12438  |
| C                                                         | 0.0345   | 4.1129   | -1.78587 | H  | -0.99943 | -2.04591 | 4.21399  |
| H                                                         | -0.22264 | 5.12462  | -2.11174 | H  | -1.80818 | -1.48812 | 2.74812  |
| H                                                         | 0.99169  | 3.84521  | -2.24359 | H  | -0.86362 | -2.98184 | 2.7222   |
| H                                                         | -0.72679 | 3.42618  | -2.1653  | C  | 2.42133  | 1.98431  | 2.94182  |
| C                                                         | 1.21587  | 5.03658  | 0.25544  | H  | 1.70643  | 2.80369  | 2.84643  |
| H                                                         | 2.19836  | 4.76808  | -0.14781 | H  | 2.80717  | 1.9941   | 3.96884  |
| H                                                         | 0.9861   | 6.0531   | -0.07688 | H  | 3.26073  | 2.19072  | 2.2758   |
| H                                                         | 1.27766  | 5.03655  | 1.34604  | C  | 3.89531  | -0.5952  | 1.74325  |
| C                                                         | -2.90761 | -0.68249 | 1.14754  | H  | 4.29756  | 0.36063  | 1.40121  |
| H                                                         | -3.25007 | -0.58787 | 2.16939  | H  | 4.47426  | -0.89902 | 2.6249   |
| C                                                         | -3.9197  | -0.68736 | 0.11979  | H  | 4.07738  | -1.33045 | 0.95809  |
| C                                                         | -5.25627 | -0.59237 | 0.57766  | C  | 1.91162  | -3.04815 | 1.8929   |
| C                                                         | -3.68258 | -0.76981 | -1.27273 | H  | 1.07537  | -3.73727 | 2.02371  |
| C                                                         | -6.3173  | -0.58358 | -0.31712 | H  | 2.2593   | -3.12909 | 0.85877  |
| H                                                         | -5.45267 | -0.5257  | 1.6438   | H  | 2.72781  | -3.39142 | 2.53966  |
| C                                                         | -4.75451 | -0.75853 | -2.15935 | N  | -1.58248 | 1.58298  | -0.30723 |
| H                                                         | -2.66732 | -0.83599 | -1.63442 | O  | -1.36206 | 0.46779  | 0.39078  |
| C                                                         | -6.06832 | -0.66671 | -1.69132 | C  | 1.57187  | -0.8952  | -1.30286 |
| H                                                         | -7.33559 | -0.51165 | 0.05125  | C  | 0.42433  | -1.32214 | -1.09624 |
| H                                                         | -4.56481 | -0.82251 | -3.22586 | C  | -0.83577 | -1.96882 | -1.36848 |
| H                                                         | -6.89604 | -0.65987 | -2.39394 | C  | -1.62469 | -1.51531 | -2.44331 |
| <b>3</b>                                                  |          |          |          | C  | -1.27006 | -3.07301 | -0.61367 |
| Sum of electronic and thermal Free Energies: -1669.732426 |          |          |          | C  | -2.81941 | -2.15952 | -2.75412 |
| C                                                         | -0.41341 | 2.39068  | -0.5504  | H  | -1.28623 | -0.66811 | -3.03179 |
| C                                                         | -0.48434 | 3.66415  | -1.1324  | C  | -2.46522 | -3.71331 | -0.9327  |
| H                                                         | -1.4292  | 4.11165  | -1.42052 | H  | -0.65864 | -3.43335 | 0.20673  |
| C                                                         | 0.68725  | 4.38684  | -1.33045 | C  | -3.24348 | -3.2578  | -2.00087 |
| C                                                         | 1.91583  | 3.84194  | -0.94743 | H  | -3.41833 | -1.80709 | -3.58907 |
| H                                                         | 2.8317   | 4.40464  | -1.1034  | H  | -2.7864  | -4.57362 | -0.35262 |
| C                                                         | 1.96886  | 2.57543  | -0.36183 | H  | -4.17348 | -3.75981 | -2.2491  |
| C                                                         | 0.80833  | 1.82426  | -0.1431  | C  | 2.89008  | -0.70378 | -1.83989 |

|                                                           |          |          |          |   |          |          |          |
|-----------------------------------------------------------|----------|----------|----------|---|----------|----------|----------|
| C                                                         | 3.85476  | -1.72393 | -1.69954 | H | -1.0894  | -2.02241 | -4.0497  |
| C                                                         | 3.2149   | 0.44811  | -2.58286 | C | -0.38203 | -3.97639 | -0.36881 |
| C                                                         | 5.11533  | -1.58318 | -2.27347 | H | -0.78546 | -4.95549 | -0.65761 |
| H                                                         | 3.59872  | -2.63169 | -1.16238 | H | 0.53991  | -3.82451 | -0.93536 |
| C                                                         | 4.47924  | 0.57848  | -3.15295 | H | -0.12841 | -4.02048 | 0.69192  |
| H                                                         | 2.47154  | 1.22492  | -2.71466 | C | -3.39272 | -0.68406 | -2.9951  |
| C                                                         | 5.43291  | -0.43032 | -2.99645 | H | -2.76597 | -0.63866 | -3.88758 |
| H                                                         | 5.84721  | -2.37765 | -2.16499 | H | -4.33519 | -1.17289 | -3.27386 |
| H                                                         | 4.71788  | 1.46717  | -3.72913 | H | -3.63154 | 0.34198  | -2.70506 |
| H                                                         | 6.41577  | -0.32406 | -3.44508 | C | -4.33389 | -0.67397 | 0.04608  |
| C                                                         | -2.79566 | 1.88827  | -0.70533 | H | -4.50606 | 0.26542  | -0.48561 |
| H                                                         | -2.86031 | 2.81035  | -1.26617 | H | -5.23367 | -1.2888  | -0.0812  |
| C                                                         | -4.03376 | 1.18261  | -0.47308 | H | -4.23537 | -0.45261 | 1.11012  |
| C                                                         | -4.1604  | -0.06874 | 0.17292  | C | -2.59486 | -2.81747 | 1.65801  |
| C                                                         | -5.20467 | 1.82608  | -0.94134 | H | -1.67686 | -3.16586 | 2.13422  |
| C                                                         | -5.41948 | -0.63411 | 0.35006  | H | -2.99992 | -2.00702 | 2.26842  |
| H                                                         | -3.27236 | -0.58219 | 0.50927  | H | -3.31817 | -3.64221 | 1.68036  |
| C                                                         | -6.45578 | 1.25293  | -0.75615 | N | 1.51842  | 0.56556  | -1.36802 |
| H                                                         | -5.12341 | 2.78471  | -1.44673 | O | 1.09691  | -0.64461 | -1.01616 |
| C                                                         | -6.56729 | 0.02031  | -0.10486 | C | -0.57829 | 1.22299  | 0.89936  |
| H                                                         | -5.50526 | -1.59545 | 0.84691  | C | -0.35641 | 0.03653  | 1.33679  |
| H                                                         | -7.34366 | 1.76372  | -1.11645 | C | 0.01112  | -0.66214 | 2.56046  |
| H                                                         | -7.545   | -0.42835 | 0.04377  | C | 0.9593   | -1.70119 | 2.53479  |
| <b>TS<sub>34</sub></b>                                    |          |          |          | C | -0.57909 | -0.29909 | 3.78592  |
| Sum of electronic and thermal Free Energies: -1669.709769 |          |          |          | C | 1.3158   | -2.35541 | 3.71397  |
| C                                                         | 0.48371  | 1.47753  | -1.7751  | H | 1.42313  | -1.96718 | 1.58958  |
| C                                                         | 0.69457  | 2.41563  | -2.78834 | C | -0.22607 | -0.96632 | 4.95879  |
| H                                                         | 1.64837  | 2.47353  | -3.30343 | H | -1.30825 | 0.50564  | 3.8103   |
| C                                                         | -0.35726 | 3.2474   | -3.17054 | C | 0.72047  | -1.9943  | 4.92667  |
| C                                                         | -1.60615 | 3.12206  | -2.55242 | H | 2.05907  | -3.14772 | 3.68808  |
| H                                                         | -2.42651 | 3.76654  | -2.8545  | H | -0.68858 | -0.68047 | 5.89944  |
| C                                                         | -1.8032  | 2.17057  | -1.55074 | H | 0.99424  | -2.50988 | 5.84275  |
| C                                                         | -0.76679 | 1.31454  | -1.14742 | C | -0.56788 | 2.6282   | 1.29294  |
| H                                                         | -2.76963 | 2.10191  | -1.0607  | C | 0.6797   | 3.25322  | 1.48005  |
| C                                                         | -2.36447 | -2.38946 | 0.24146  | C | -1.7463  | 3.34806  | 1.56314  |
| C                                                         | -3.13477 | -1.39944 | -0.48344 | C | 0.74394  | 4.57019  | 1.93944  |
| C                                                         | -2.72779 | -1.43825 | -1.88382 | H | 1.59256  | 2.6941   | 1.28286  |
| C                                                         | -1.62896 | -2.31594 | -1.98231 | C | -1.67468 | 4.66998  | 2.0091   |
| C                                                         | -1.38298 | -2.89793 | -0.65116 | H | -2.71532 | 2.86833  | 1.43465  |
| Rh                                                        | -1.02527 | -0.69913 | -0.47544 | C | -0.43103 | 5.28274  | 2.19753  |
| H                                                         | -0.20499 | 3.97812  | -3.95946 | H | 1.71376  | 5.03896  | 2.09511  |
| C                                                         | -0.8365  | -2.66503 | -3.20436 | H | -2.59204 | 5.21939  | 2.21928  |
| H                                                         | 0.23725  | -2.56694 | -3.01447 | H | -0.37675 | 6.30883  | 2.54772  |
| H                                                         | -1.02743 | -3.70334 | -3.50247 | C | 2.78596  | 0.91043  | -1.34423 |

|                                                           |          |          |          |   |          |          |          |
|-----------------------------------------------------------|----------|----------|----------|---|----------|----------|----------|
| H                                                         | 2.95883  | 1.94819  | -1.59981 | H | -5.37489 | -0.86768 | -0.49452 |
| C                                                         | 3.94015  | 0.09873  | -1.04165 | H | -4.45534 | 0.52317  | 0.09749  |
| C                                                         | 3.91369  | -1.28382 | -0.74834 | C | -3.31017 | -0.7432  | 2.49738  |
| C                                                         | 5.18729  | 0.76695  | -1.06255 | H | -2.49205 | -0.43214 | 3.14956  |
| C                                                         | 5.10248  | -1.9595  | -0.48829 | H | -3.9066  | 0.13981  | 2.26318  |
| H                                                         | 2.96646  | -1.80313 | -0.73816 | H | -3.94846 | -1.43359 | 3.06353  |
| C                                                         | 6.36647  | 0.08283  | -0.79733 | N | 1.6335   | -0.66248 | -1.18569 |
| H                                                         | 5.22053  | 1.82917  | -1.29111 | O | 0.93178  | -1.40751 | -0.3381  |
| C                                                         | 6.32669  | -1.28496 | -0.50921 | C | -0.13054 | 1.64629  | -0.58907 |
| H                                                         | 5.07626  | -3.02246 | -0.26875 | C | -0.49966 | 0.92508  | 0.49642  |
| H                                                         | 7.31486  | 0.61017  | -0.81787 | C | -0.42841 | 1.37068  | 1.90061  |
| H                                                         | 7.2476   | -1.82282 | -0.30413 | C | 0.76872  | 1.15124  | 2.61079  |
| <b>4</b>                                                  |          |          |          | C | -1.4928  | 1.99706  | 2.57234  |
| Sum of electronic and thermal Free Energies: -1669.750234 |          |          |          | C | 0.8986   | 1.5597   | 3.93697  |
| C                                                         | 0.8691   | -0.04406 | -2.2509  | H | 1.60025  | 0.66682  | 2.10777  |
| C                                                         | 1.03133  | -0.54824 | -3.54413 | C | -1.36017 | 2.4068   | 3.89994  |
| H                                                         | 1.73402  | -1.35713 | -3.71792 | H | -2.42502 | 2.17704  | 2.0458   |
| C                                                         | 0.28272  | -0.01189 | -4.58825 | C | -0.16486 | 2.19013  | 4.58751  |
| C                                                         | -0.62093 | 1.0225   | -4.32558 | H | 1.83557  | 1.39371  | 4.46081  |
| H                                                         | -1.20273 | 1.45276  | -5.13479 | H | -2.19029 | 2.90245  | 4.39487  |
| C                                                         | -0.76647 | 1.519    | -3.03279 | H | -0.06094 | 2.51356  | 5.61867  |
| C                                                         | -0.0343  | 0.9961   | -1.9482  | C | 0.1275   | 3.1225   | -0.59489 |
| H                                                         | -1.43649 | 2.35187  | -2.84472 | C | -0.81042 | 4.02632  | -0.07123 |
| C                                                         | -2.82309 | -1.42944 | 1.26315  | C | 1.29523  | 3.639    | -1.18307 |
| C                                                         | -3.32096 | -1.30096 | -0.06336 | C | -0.58089 | 5.40162  | -0.11559 |
| C                                                         | -2.76994 | -2.408   | -0.87617 | H | -1.73249 | 3.64954  | 0.356    |
| C                                                         | -1.87511 | -3.13422 | -0.08722 | C | 1.52872  | 5.01269  | -1.22052 |
| C                                                         | -1.80351 | -2.46466 | 1.22105  | H | 2.02825  | 2.95954  | -1.61036 |
| Rh                                                        | -1.13806 | -0.91368 | -0.10184 | C | 0.59016  | 5.89941  | -0.68739 |
| H                                                         | 0.40542  | -0.39597 | -5.5955  | H | -1.32347 | 6.08343  | 0.2892   |
| C                                                         | -1.02891 | -4.30654 | -0.47721 | H | 2.4412   | 5.39264  | -1.67038 |
| H                                                         | 0.03535  | -4.07715 | -0.35732 | H | 0.76699  | 6.97006  | -0.72546 |
| H                                                         | -1.2557  | -5.17512 | 0.15138  | C | 2.93844  | -0.56137 | -1.13223 |
| H                                                         | -1.19454 | -4.59528 | -1.51671 | H | 3.35846  | 0.05272  | -1.92142 |
| C                                                         | -1.02184 | -2.96323 | 2.39366  | C | 3.85086  | -1.17666 | -0.1951  |
| H                                                         | -1.6002  | -3.72969 | 2.92732  | C | 3.46645  | -1.96166 | 0.91615  |
| H                                                         | -0.08132 | -3.42111 | 2.07892  | C | 5.22767  | -0.9638  | -0.43775 |
| H                                                         | -0.79931 | -2.15966 | 3.09918  | C | 4.43948  | -2.5094  | 1.74616  |
| C                                                         | -3.12258 | -2.63048 | -2.31369 | H | 2.41619  | -2.12567 | 1.10923  |
| H                                                         | -2.48394 | -3.38303 | -2.77895 | C | 6.18973  | -1.52334 | 0.39312  |
| H                                                         | -4.16276 | -2.96632 | -2.40473 | H | 5.53492  | -0.36037 | -1.28755 |
| H                                                         | -3.03231 | -1.70513 | -2.89215 | C | 5.79691  | -2.29879 | 1.48832  |
| C                                                         | -4.39778 | -0.36902 | -0.52918 | H | 4.13814  | -3.10996 | 2.59899  |
| H                                                         | -4.23208 | -0.04782 | -1.56083 | H | 7.24288  | -1.35825 | 0.19043  |

|                                                           |          |          |          |                                                           |          |          |          |
|-----------------------------------------------------------|----------|----------|----------|-----------------------------------------------------------|----------|----------|----------|
| H                                                         | 6.54738  | -2.73805 | 2.13843  | C                                                         | -1.25284 | 3.46402  | 0.59208  |
| TS <sub>34</sub>                                          |          |          |          | C                                                         | -2.6434  | 2.34292  | -1.05179 |
| Sum of electronic and thermal Free Energies: -1669.701890 |          |          |          | C                                                         | -2.16682 | 4.51372  | 0.6442   |
| C                                                         | -0.77985 | -0.28883 | 2.15006  | H                                                         | -0.35667 | 3.48587  | 1.20318  |
| C                                                         | -1.2741  | 0.0559   | 3.41583  | C                                                         | -3.56283 | 3.38588  | -0.97847 |
| H                                                         | -2.32517 | 0.28138  | 3.56944  | H                                                         | -2.82106 | 1.50942  | -1.72226 |
| C                                                         | -0.38395 | 0.14599  | 4.47895  | C                                                         | -3.32536 | 4.47499  | -0.13506 |
| C                                                         | 0.97728  | -0.08631 | 4.25557  | H                                                         | -1.97992 | 5.35712  | 1.30173  |
| H                                                         | 1.67958  | -0.00492 | 5.08025  | H                                                         | -4.45988 | 3.35716  | -1.58952 |
| C                                                         | 1.44505  | -0.39389 | 2.97614  | H                                                         | -4.04052 | 5.29048  | -0.08689 |
| C                                                         | 0.58527  | -0.51029 | 1.87272  | C                                                         | 1.83809  | 2.16883  | -0.54724 |
| H                                                         | 2.51256  | -0.53096 | 2.83481  | C                                                         | 2.88415  | 2.36297  | 0.37418  |
| C                                                         | 2.77342  | -1.3788  | -1.58413 | C                                                         | 1.77673  | 2.9981   | -1.68246 |
| C                                                         | 3.12107  | -1.66054 | -0.18998 | C                                                         | 3.82938  | 3.3681   | 0.17252  |
| C                                                         | 2.34938  | -2.82809 | 0.23431  | H                                                         | 2.93553  | 1.73452  | 1.25747  |
| C                                                         | 1.43342  | -3.11758 | -0.79494 | C                                                         | 2.73362  | 3.99178  | -1.88693 |
| C                                                         | 1.70048  | -2.21936 | -1.928   | H                                                         | 0.97778  | 2.85502  | -2.40357 |
| Rh                                                        | 1.10008  | -0.91821 | -0.06527 | C                                                         | 3.76112  | 4.18253  | -0.96072 |
| H                                                         | -0.74449 | 0.41658  | 5.46557  | H                                                         | 4.62187  | 3.51492  | 0.90062  |
| C                                                         | 0.41093  | -4.21377 | -0.81598 | H                                                         | 2.67404  | 4.61992  | -2.77083 |
| H                                                         | -0.52135 | -3.88597 | -1.28546 | H                                                         | 4.50328  | 4.95852  | -1.12075 |
| H                                                         | 0.778    | -5.07009 | -1.3958  | C                                                         | -2.93129 | -0.85284 | 1.12844  |
| H                                                         | 0.17704  | -4.57115 | 0.189    | H                                                         | -3.234   | -1.05499 | 2.15044  |
| C                                                         | 0.99242  | -2.29323 | -3.24795 | C                                                         | -3.9149  | -1.10816 | 0.10535  |
| H                                                         | 1.37516  | -3.13113 | -3.84426 | C                                                         | -3.67635 | -1.14101 | -1.2895  |
| H                                                         | -0.08213 | -2.45498 | -3.12134 | C                                                         | -5.21633 | -1.39499 | 0.58276  |
| H                                                         | 1.12998  | -1.38154 | -3.83277 | C                                                         | -4.71704 | -1.43654 | -2.16135 |
| C                                                         | 2.54364  | -3.57542 | 1.51835  | H                                                         | -2.68256 | -0.95187 | -1.66913 |
| H                                                         | 1.6843   | -4.20663 | 1.75394  | C                                                         | -6.25132 | -1.67658 | -0.29933 |
| H                                                         | 3.42425  | -4.22584 | 1.4472   | H                                                         | -5.40866 | -1.38693 | 1.65203  |
| H                                                         | 2.70166  | -2.90147 | 2.36377  | C                                                         | -6.00319 | -1.69722 | -1.67442 |
| C                                                         | 4.33601  | -1.12782 | 0.50655  | H                                                         | -4.52729 | -1.46697 | -3.22954 |
| H                                                         | 4.27205  | -1.25572 | 1.58968  | H                                                         | -7.24568 | -1.88513 | 0.08121  |
| H                                                         | 5.22977  | -1.66927 | 0.1691   | H                                                         | -6.80834 | -1.92326 | -2.36668 |
| H                                                         | 4.49168  | -0.06798 | 0.29376  | 4                                                         |          |          |          |
| C                                                         | 3.47651  | -0.38518 | -2.45616 | Sum of electronic and thermal Free Energies: -1669.710049 |          |          |          |
| H                                                         | 2.87505  | -0.10776 | -3.32428 | C                                                         | -0.80382 | -0.26523 | 2.14026  |
| H                                                         | 3.72036  | 0.52993  | -1.91199 | C                                                         | -1.30405 | 0.09544  | 3.39914  |
| H                                                         | 4.41736  | -0.81235 | -2.82568 | H                                                         | -2.35306 | 0.34193  | 3.53498  |
| N                                                         | -1.69456 | -0.439   | 1.04624  | C                                                         | -0.42307 | 0.16887  | 4.47086  |
| O                                                         | -1.14153 | -0.22441 | -0.20405 | C                                                         | 0.93425  | -0.09301 | 4.25768  |
| C                                                         | 0.83641  | 1.11225  | -0.32481 | H                                                         | 1.63189  | -0.02404 | 5.08746  |
| C                                                         | -0.47011 | 1.32162  | -0.32678 | C                                                         | 1.40697  | -0.41405 | 2.98299  |
| C                                                         | -1.47686 | 2.36747  | -0.26482 | C                                                         | 0.55854  | -0.51729 | 1.86858  |

|    |          |          |          |                                                           |          |          |          |
|----|----------|----------|----------|-----------------------------------------------------------|----------|----------|----------|
| H  | 2.47297  | -0.57196 | 2.85458  | C                                                         | 2.77869  | 2.39896  | 0.38611  |
| C  | 2.82271  | -1.33063 | -1.55621 | C                                                         | 1.67627  | 2.96009  | -1.69371 |
| C  | 3.14912  | -1.61656 | -0.15655 | C                                                         | 3.70264  | 3.42092  | 0.16957  |
| C  | 2.415    | -2.82249 | 0.23839  | H                                                         | 2.83786  | 1.7929   | 1.28477  |
| C  | 1.53131  | -3.12764 | -0.80883 | C                                                         | 2.61199  | 3.97027  | -1.91333 |
| C  | 1.78363  | -2.1998  | -1.92526 | H                                                         | 0.8861   | 2.78382  | -2.41715 |
| Rh | 1.11541  | -0.93382 | -0.06377 | C                                                         | 3.62655  | 4.20684  | -0.98308 |
| H  | -0.78575 | 0.44977  | 5.45374  | H                                                         | 4.48434  | 3.6033   | 0.90134  |
| C  | 0.54072  | -4.25122 | -0.86393 | H                                                         | 2.54608  | 4.57616  | -2.81222 |
| H  | -0.40333 | -3.93316 | -1.31688 | H                                                         | 4.35187  | 4.99613  | -1.15485 |
| H  | 0.92764  | -5.07537 | -1.47646 | C                                                         | -2.9297  | -0.90843 | 1.11125  |
| H  | 0.32292  | -4.65048 | 0.1287   | H                                                         | -3.20336 | -1.17765 | 2.12687  |
| C  | 1.0971   | -2.27851 | -3.25596 | C                                                         | -3.91168 | -1.17568 | 0.09025  |
| H  | 1.52102  | -3.09025 | -3.86067 | C                                                         | -3.68712 | -1.15696 | -1.3074  |
| H  | 0.02826  | -2.48517 | -3.14757 | C                                                         | -5.19337 | -1.53491 | 0.57277  |
| H  | 1.20632  | -1.35179 | -3.82276 | C                                                         | -4.72468 | -1.46858 | -2.17708 |
| C  | 2.61371  | -3.57468 | 1.51875  | H                                                         | -2.7068  | -0.91761 | -1.69399 |
| H  | 1.78682  | -4.25915 | 1.71888  | C                                                         | -6.22603 | -1.83119 | -0.307   |
| H  | 3.53369  | -4.17026 | 1.46969  | H                                                         | -5.37283 | -1.56869 | 1.64372  |
| H  | 2.70336  | -2.90384 | 2.37679  | C                                                         | -5.99317 | -1.79726 | -1.68457 |
| C  | 4.32936  | -1.04833 | 0.56931  | H                                                         | -4.54626 | -1.45846 | -3.2475  |
| H  | 4.25579  | -1.20004 | 1.64857  | H                                                         | -7.20626 | -2.09345 | 0.07681  |
| H  | 5.24864  | -1.54702 | 0.23414  | H                                                         | -6.79635 | -2.03478 | -2.37526 |
| H  | 4.44343  | 0.02049  | 0.37686  | <b>TS<sub>45</sub></b>                                    |          |          |          |
| C  | 3.51368  | -0.30932 | -2.40518 | Sum of electronic and thermal Free Energies: -1669.720820 |          |          |          |
| H  | 2.92152  | -0.04184 | -3.28272 | C                                                         | -0.62636 | -0.4845  | 2.35649  |
| H  | 3.71968  | 0.60766  | -1.84875 | C                                                         | -0.77168 | -1.19185 | 3.5593   |
| H  | 4.47337  | -0.70628 | -2.7598  | H                                                         | -1.70993 | -1.69927 | 3.76107  |
| N  | -1.72635 | -0.40836 | 1.04458  | C                                                         | 0.28202  | -1.26315 | 4.45638  |
| O  | -1.18947 | -0.12003 | -0.22761 | C                                                         | 1.4943   | -0.632   | 4.13271  |
| C  | 0.77277  | 1.08022  | -0.31021 | H                                                         | 2.33192  | -0.68676 | 4.82132  |
| C  | -0.55889 | 1.22859  | -0.29247 | C                                                         | 1.64392  | 0.05346  | 2.93887  |
| C  | -1.49343 | 2.36051  | -0.25004 | C                                                         | 0.59128  | 0.15801  | 1.98869  |
| C  | -1.14719 | 3.51466  | 0.47881  | H                                                         | 2.58799  | 0.53566  | 2.71456  |
| C  | -2.72973 | 2.33196  | -0.91992 | C                                                         | 1.82437  | -1.70917 | -2.35586 |
| C  | -2.00858 | 4.6079   | 0.52421  | C                                                         | 2.8066   | -1.50914 | -1.30734 |
| H  | -0.20031 | 3.5465   | 1.00677  | C                                                         | 2.59013  | -2.51379 | -0.26965 |
| C  | -3.5941  | 3.42372  | -0.86055 | C                                                         | 1.40119  | -3.19076 | -0.58782 |
| H  | -3.00936 | 1.45964  | -1.50025 | C                                                         | 0.90391  | -2.68275 | -1.87632 |
| C  | -3.23624 | 4.56582  | -0.14135 | Rh                                                        | 0.87501  | -0.93857 | -0.44031 |
| H  | -1.72541 | 5.49074  | 1.0893   | H                                                         | 0.17381  | -1.81402 | 5.38418  |
| H  | -4.54372 | 3.387    | -1.38614 | C                                                         | 0.73967  | -4.28936 | 0.18967  |
| H  | -3.90855 | 5.41733  | -0.10032 | H                                                         | -0.3463  | -4.16226 | 0.22085  |
| C  | 1.74397  | 2.15843  | -0.53829 | H                                                         | 0.93844  | -5.26194 | -0.27743 |

|   |          |          |          |                                                           |          |          |          |
|---|----------|----------|----------|-----------------------------------------------------------|----------|----------|----------|
| H | 1.10247  | -4.33502 | 1.21832  | H                                                         | -3.09064 | 0.09856  | 2.82352  |
| C | -0.27261 | -3.25033 | -2.61089 | C                                                         | -4.14386 | -0.23956 | 0.96441  |
| H | 0.00592  | -4.18368 | -3.1174  | C                                                         | -4.17475 | -0.55605 | -0.41352 |
| H | -1.09547 | -3.48262 | -1.93033 | C                                                         | -5.36218 | 0.02851  | 1.63284  |
| H | -0.6484  | -2.56161 | -3.37092 | C                                                         | -5.39309 | -0.61496 | -1.08035 |
| C | 3.47712  | -2.71507 | 0.92114  | H                                                         | -3.2458  | -0.74142 | -0.9337  |
| H | 3.01086  | -3.35992 | 1.66863  | C                                                         | -6.57202 | -0.0285  | 0.95409  |
| H | 4.42355  | -3.18309 | 0.62333  | H                                                         | -5.34945 | 0.27556  | 2.69106  |
| H | 3.72259  | -1.76607 | 1.40827  | C                                                         | -6.59011 | -0.35238 | -0.40588 |
| C | 4.03429  | -0.65495 | -1.41018 | H                                                         | -5.41203 | -0.86115 | -2.13746 |
| H | 4.31587  | -0.23309 | -0.44217 | H                                                         | -7.4986  | 0.1769   | 1.4802   |
| H | 4.8806   | -1.25739 | -1.76509 | H                                                         | -7.53454 | -0.39625 | -0.93964 |
| H | 3.90034  | 0.16825  | -2.11528 | <b>5</b>                                                  |          |          |          |
| C | 1.85652  | -1.07929 | -3.71625 | Sum of electronic and thermal Free Energies: -1669.726577 |          |          |          |
| H | 0.88597  | -1.13624 | -4.21424 | C                                                         | -0.93048 | 0.07487  | 2.52159  |
| H | 2.15648  | -0.02923 | -3.67662 | C                                                         | -1.23252 | -0.27736 | 3.84926  |
| H | 2.5795   | -1.60173 | -4.35575 | H                                                         | -2.20057 | -0.70765 | 4.08719  |
| N | -1.70895 | -0.41593 | 1.46709  | C                                                         | -0.26891 | -0.10283 | 4.82593  |
| O | -1.29654 | -0.54702 | 0.05177  | C                                                         | 0.9901   | 0.42099  | 4.47117  |
| C | 0.76551  | 1.01755  | 0.79507  | H                                                         | 1.74202  | 0.57183  | 5.23947  |
| C | 0.07991  | 0.86167  | -0.43332 | C                                                         | 1.28829  | 0.74098  | 3.15796  |
| C | -0.50862 | 1.81814  | -1.3432  | C                                                         | 0.33958  | 0.56303  | 2.12142  |
| C | -0.95945 | 3.07475  | -0.88116 | H                                                         | 2.25826  | 1.15448  | 2.9092   |
| C | -0.69974 | 1.48321  | -2.69866 | C                                                         | 2.80021  | -1.13146 | -1.45728 |
| C | -1.56112 | 3.97079  | -1.75666 | C                                                         | 3.30584  | -1.72774 | -0.21878 |
| H | -0.81929 | 3.34054  | 0.16109  | C                                                         | 2.4891   | -2.83725 | 0.06432  |
| C | -1.30505 | 2.38164  | -3.57083 | C                                                         | 1.54184  | -3.02008 | -1.04292 |
| H | -0.37072 | 0.51028  | -3.04536 | C                                                         | 1.7741   | -2.01256 | -2.00711 |
| C | -1.73366 | 3.6274   | -3.10204 | Rh                                                        | 1.11422  | -0.97012 | -0.0921  |
| H | -1.89796 | 4.93721  | -1.39486 | H                                                         | -0.47841 | -0.38138 | 5.85298  |
| H | -1.4447  | 2.11657  | -4.61429 | C                                                         | 0.57073  | -4.15754 | -1.13785 |
| H | -2.20437 | 4.32977  | -3.78338 | H                                                         | -0.20992 | -3.96567 | -1.87705 |
| C | 1.68242  | 2.19946  | 0.90998  | H                                                         | 1.08756  | -5.07987 | -1.43345 |
| C | 1.61291  | 3.04015  | 2.03689  | H                                                         | 0.08714  | -4.35669 | -0.17688 |
| C | 2.57102  | 2.53883  | -0.12286 | C                                                         | 1.13304  | -1.8648  | -3.3539  |
| C | 2.40803  | 4.18126  | 2.12323  | H                                                         | 1.80725  | -2.21863 | -4.14417 |
| H | 0.92834  | 2.80116  | 2.84494  | H                                                         | 0.21056  | -2.44528 | -3.42408 |
| C | 3.36736  | 3.68043  | -0.03421 | H                                                         | 0.88656  | -0.82217 | -3.57279 |
| H | 2.63506  | 1.90301  | -0.99888 | C                                                         | 2.60334  | -3.75699 | 1.24302  |
| C | 3.28959  | 4.50516  | 1.08884  | H                                                         | 1.62179  | -4.07322 | 1.60768  |
| H | 2.33657  | 4.82002  | 2.99844  | H                                                         | 3.15391  | -4.66663 | 0.97043  |
| H | 4.05133  | 3.92326  | -0.84191 | H                                                         | 3.13505  | -3.28581 | 2.07257  |
| H | 3.91084  | 5.39262  | 1.15937  | C                                                         | 4.51008  | -1.27619 | 0.55187  |
| C | -2.95621 | -0.17171 | 1.77938  | H                                                         | 4.37997  | -1.40663 | 1.6295   |



|   |          |          |          |                                              |              |          |          |
|---|----------|----------|----------|----------------------------------------------|--------------|----------|----------|
| H | 5.39292  | -1.85823 | 0.25656  | H                                            | -7.44821     | -1.28018 | -1.2038  |
| H | 4.74482  | -0.22615 | 0.36383  | <b>TS<sub>56</sub></b>                       |              |          |          |
| C | 3.47234  | -0.03184 | -2.22046 | Sum of electronic and thermal Free Energies: | -1669.717490 |          |          |
| H | 2.80722  | 0.39812  | -2.97123 | C                                            | -0.90106     | -1.42113 | 0.81369  |
| H | 3.81922  | 0.7736   | -1.56974 | C                                            | -1.0912      | -2.85095 | 0.94165  |
| H | 4.34846  | -0.43206 | -2.74802 | H                                            | -1.777       | -3.33983 | 0.25578  |
| N | -1.9022  | -0.03102 | 1.51924  | C                                            | -0.46556     | -3.56122 | 1.92659  |
| O | -1.34926 | -0.45648 | 0.26305  | C                                            | 0.38585      | -2.90547 | 2.86898  |
| C | 0.57536  | 0.97556  | 0.72496  | H                                            | 0.8144       | -3.47897 | 3.6849   |
| C | -0.3511  | 0.49146  | -0.28384 | C                                            | 0.6746       | -1.57339 | 2.74919  |
| C | -0.77471 | 1.14452  | -1.54701 | C                                            | 0.10123      | -0.78368 | 1.69582  |
| C | -2.10429 | 1.09379  | -1.99474 | H                                            | 1.33209      | -1.08208 | 3.45783  |
| C | 0.17122  | 1.80394  | -2.35699 | C                                            | 2.60986      | -0.47526 | -1.88084 |
| C | -2.47675 | 1.68328  | -3.20371 | C                                            | 2.87132      | -1.62908 | -1.1121  |
| H | -2.85464 | 0.59199  | -1.40012 | C                                            | 1.77561      | -2.56046 | -1.33039 |
| C | -0.20636 | 2.3956   | -3.55939 | C                                            | 0.89402      | -2.0128  | -2.34034 |
| H | 1.20407  | 1.85858  | -2.03832 | C                                            | 1.3733       | -0.7093  | -2.64235 |
| C | -1.53291 | 2.33716  | -3.99373 | Rh                                           | 0.8004       | -0.76154 | -0.43319 |
| H | -3.51265 | 1.6285   | -3.5253  | H                                            | -0.63058     | -4.63094 | 2.00973  |
| H | 0.54245  | 2.90121  | -4.16203 | C                                            | -0.25187     | -2.72723 | -2.99658 |
| H | -1.82351 | 2.7933   | -4.93479 | H                                            | -1.00416     | -2.02774 | -3.36848 |
| C | 1.32523  | 2.26847  | 0.55148  | H                                            | 0.10074      | -3.31737 | -3.85164 |
| C | 2.72511  | 2.32739  | 0.55205  | H                                            | -0.74839     | -3.41824 | -2.31002 |
| C | 0.60619  | 3.47262  | 0.47018  | C                                            | 0.82219      | 0.23418  | -3.66261 |
| C | 3.39198  | 3.5522   | 0.46656  | H                                            | 1.42492      | 0.17927  | -4.57984 |
| H | 3.29093  | 1.40506  | 0.62469  | H                                            | -0.20915     | -0.00994 | -3.92832 |
| C | 1.2697   | 4.69521  | 0.3765   | H                                            | 0.84795      | 1.27046  | -3.3147  |
| H | -0.47973 | 3.44904  | 0.4724   | C                                            | 1.7366       | -3.95333 | -0.78547 |
| C | 2.66576  | 4.73951  | 0.37389  | H                                            | 0.76402      | -4.42395 | -0.93326 |
| H | 4.47786  | 3.57606  | 0.47114  | H                                            | 2.48669      | -4.57032 | -1.29624 |
| H | 0.69565  | 5.61447  | 0.30813  | H                                            | 1.9644       | -3.97705 | 0.28376  |
| H | 3.18184  | 5.69192  | 0.30229  | C                                            | 4.08643      | -1.91092 | -0.28128 |
| C | -3.19368 | 0.17278  | 1.64578  | H                                            | 3.83845      | -2.44292 | 0.64234  |
| H | -3.44447 | 0.71079  | 2.55733  | H                                            | 4.78804      | -2.54487 | -0.83896 |
| C | -4.28527 | -0.2441  | 0.8075   | H                                            | 4.61839      | -0.99424 | -0.01718 |
| C | -4.19135 | -1.21075 | -0.22307 | C                                            | 3.51743      | 0.70353  | -2.05803 |
| C | -5.54699 | 0.32594  | 1.10282  | H                                            | 2.96312      | 1.60492  | -2.32262 |
| C | -5.32913 | -1.57827 | -0.92893 | H                                            | 4.09113      | 0.91431  | -1.15168 |
| H | -3.2363  | -1.66591 | -0.45174 | H                                            | 4.23462      | 0.50597  | -2.86518 |
| C | -6.67393 | -0.03713 | 0.3774   | N                                            | -2.10047     | -0.68883 | 0.47666  |
| H | -5.62988 | 1.05752  | 1.90191  | O                                            | -1.64963     | 0.98234  | 0.56242  |
| C | -6.56708 | -0.99019 | -0.63984 | C                                            | 0.54816      | 0.5365   | 1.31493  |
| H | -5.25545 | -2.32698 | -1.71098 | C                                            | -0.35486     | 1.16346  | 0.33367  |
| H | -7.63396 | 0.41365  | 0.60608  | C                                            | -0.03905     | 2.23675  | -0.65408 |

|                                                           |          |          |          |    |          |          |          |
|-----------------------------------------------------------|----------|----------|----------|----|----------|----------|----------|
| C                                                         | -1.03208 | 2.64159  | -1.56656 | H  | 2.12517  | -0.20722 | 2.54589  |
| C                                                         | 1.19561  | 2.91088  | -0.67952 | C  | 2.86847  | -0.57331 | -1.99829 |
| C                                                         | -0.80256 | 3.68     | -2.46614 | C  | 3.42448  | -1.09198 | -0.77706 |
| H                                                         | -1.98611 | 2.127    | -1.57475 | C  | 2.77557  | -2.34905 | -0.50998 |
| C                                                         | 1.41377  | 3.96335  | -1.56978 | C  | 1.85536  | -2.64531 | -1.5915  |
| H                                                         | 1.98326  | 2.62517  | -0.00322 | C  | 1.89773  | -1.54244 | -2.49662 |
| C                                                         | 0.4206   | 4.35563  | -2.4683  | Rh | 1.19105  | -0.78176 | -0.54519 |
| H                                                         | -1.58752 | 3.96398  | -3.1707  | H  | 0.01672  | -3.63627 | 4.0194   |
| H                                                         | 2.36834  | 4.47921  | -1.55759 | C  | 1.04595  | -3.89509 | -1.75279 |
| H                                                         | 0.59405  | 5.1753   | -3.15975 | H  | 0.06158  | -3.68769 | -2.20297 |
| C                                                         | 1.59758  | 1.26747  | 2.0787   | H  | 1.56918  | -4.60707 | -2.41689 |
| C                                                         | 2.89472  | 0.75901  | 2.25499  | H  | 0.88187  | -4.39286 | -0.79285 |
| C                                                         | 1.26142  | 2.48817  | 2.68936  | C  | 1.11995  | -1.4296  | -3.77122 |
| C                                                         | 3.83298  | 1.45445  | 3.01842  | H  | 1.58722  | -2.04613 | -4.54916 |
| H                                                         | 3.16675  | -0.1793  | 1.78336  | H  | 0.09335  | -1.77971 | -3.64138 |
| C                                                         | 2.19961  | 3.17992  | 3.45419  | H  | 1.08382  | -0.40121 | -4.13602 |
| H                                                         | 0.26018  | 2.89004  | 2.56475  | C  | 3.08704  | -3.27936 | 0.61865  |
| C                                                         | 3.48826  | 2.66672  | 3.61955  | H  | 2.17824  | -3.67755 | 1.08202  |
| H                                                         | 4.83361  | 1.05038  | 3.14237  | H  | 3.66404  | -4.13311 | 0.23757  |
| H                                                         | 1.92302  | 4.11987  | 3.92188  | H  | 3.6785   | -2.79167 | 1.39611  |
| H                                                         | 4.21888  | 3.20779  | 4.21303  | C  | 4.56613  | -0.52031 | 0.00812  |
| C                                                         | -3.31712 | -1.045   | 0.75155  | H  | 4.40467  | -0.60743 | 1.08567  |
| H                                                         | -3.44055 | -2.01711 | 1.23333  | H  | 5.49371  | -1.05555 | -0.23158 |
| C                                                         | -4.53801 | -0.30598 | 0.50796  | H  | 4.73199  | 0.53439  | -0.22287 |
| C                                                         | -4.5927  | 0.96882  | -0.09704 | C  | 3.29109  | 0.66764  | -2.72196 |
| C                                                         | -5.74014 | -0.92527 | 0.91802  | H  | 2.43785  | 1.19015  | -3.16342 |
| C                                                         | -5.81981 | 1.59173  | -0.2879  | H  | 3.81755  | 1.36389  | -2.06808 |
| H                                                         | -3.67525 | 1.46     | -0.38981 | H  | 3.97063  | 0.40147  | -3.54    |
| C                                                         | -6.963   | -0.29247 | 0.72724  | N  | -2.13862 | -1.01728 | 1.00326  |
| H                                                         | -5.70586 | -1.90717 | 1.38538  | O  | -0.75573 | -0.09947 | -0.999   |
| C                                                         | -7.00441 | 0.96784  | 0.12271  | C  | 0.37009  | 0.75795  | 0.85271  |
| H                                                         | -5.85809 | 2.57008  | -0.75517 | C  | -0.34962 | 0.96878  | -0.38714 |
| H                                                         | -7.88039 | -0.77698 | 1.04706  | C  | -0.64999 | 2.27826  | -1.02818 |
| H                                                         | -7.95805 | 1.46535  | -0.0265  | C  | -1.93066 | 2.39346  | -1.60454 |
| <b>6</b>                                                  |          |          |          | C  | 0.23066  | 3.37172  | -1.0983  |
| Sum of electronic and thermal Free Energies: -1669.808976 |          |          |          | C  | -2.33008 | 3.58363  | -2.20671 |
| C                                                         | -1.00982 | -1.31204 | 1.72003  | H  | -2.61434 | 1.55287  | -1.55207 |
| C                                                         | -1.00642 | -2.45981 | 2.5534   | C  | -0.16547 | 4.54995  | -1.72981 |
| H                                                         | -1.89288 | -3.08499 | 2.5541   | H  | 1.22537  | 3.30552  | -0.67429 |
| C                                                         | 0.06754  | -2.76954 | 3.3673   | C  | -1.44715 | 4.66411  | -2.27575 |
| C                                                         | 1.20586  | -1.94276 | 3.37467  | H  | -3.33045 | 3.6672   | -2.62304 |
| H                                                         | 2.0377   | -2.15847 | 4.03716  | H  | 0.52974  | 5.38282  | -1.79009 |
| C                                                         | 1.25467  | -0.85292 | 2.53229  | H  | -1.7554  | 5.58969  | -2.75223 |
| C                                                         | 0.19607  | -0.5143  | 1.6275   | C  | 1.03679  | 1.8949   | 1.57002  |

|                                                           |          |          |          |   |          |          |          |
|-----------------------------------------------------------|----------|----------|----------|---|----------|----------|----------|
| C                                                         | 2.36329  | 2.27549  | 1.32255  | H | 1.93776  | -3.86314 | 1.37887  |
| C                                                         | 0.31008  | 2.58806  | 2.54942  | C | 3.32034  | -2.52007 | -2.3262  |
| C                                                         | 2.9492   | 3.3294   | 2.02663  | H | 4.37317  | -2.74329 | -2.54189 |
| H                                                         | 2.93328  | 1.74054  | 0.56515  | H | 2.7774   | -3.46657 | -2.30083 |
| C                                                         | 0.89054  | 3.6449   | 3.24927  | H | 2.93681  | -1.92735 | -3.16008 |
| H                                                         | -0.71238 | 2.29952  | 2.75677  | C | 2.85062  | -1.39276 | 2.68639  |
| C                                                         | 2.21519  | 4.01493  | 2.99191  | H | 2.06209  | -2.10009 | 2.9514   |
| H                                                         | 3.97578  | 3.61284  | 1.82209  | H | 3.79755  | -1.78571 | 3.0811   |
| H                                                         | 0.30827  | 4.18116  | 3.9969   | H | 2.64278  | -0.44821 | 3.1883   |
| H                                                         | 2.66785  | 4.83505  | 3.54018  | C | 3.69673  | 1.28813  | 1.15593  |
| C                                                         | -3.32192 | -0.99843 | 1.49939  | H | 3.07759  | 1.46072  | 2.03862  |
| H                                                         | -3.48437 | -1.05646 | 2.58634  | H | 4.7456   | 1.31259  | 1.47578  |
| C                                                         | -4.52011 | -0.89763 | 0.66926  | H | 3.54041  | 2.11842  | 0.46537  |
| C                                                         | -4.4313  | -0.8501  | -0.73628 | C | 3.95202  | 0.55401  | -1.96054 |
| C                                                         | -5.78294 | -0.88013 | 1.28426  | H | 3.43556  | 0.35045  | -2.90059 |
| C                                                         | -5.58845 | -0.78385 | -1.50288 | H | 3.8054   | 1.60688  | -1.71799 |
| H                                                         | -3.44902 | -0.87093 | -1.19776 | H | 5.02455  | 0.39275  | -2.13144 |
| C                                                         | -6.94067 | -0.81876 | 0.51076  | N | -1.95862 | -1.09487 | 0.72803  |
| H                                                         | -5.85396 | -0.91988 | 2.36864  | O | -0.17721 | -1.82318 | -0.41886 |
| C                                                         | -6.84416 | -0.77026 | -0.8817  | C | -0.49735 | 1.29431  | 0.92767  |
| H                                                         | -5.52008 | -0.7494  | -2.5864  | C | 0.40277  | 1.02219  | -0.05918 |
| H                                                         | -7.91432 | -0.81067 | 0.99063  | C | 0.78426  | 1.91204  | -1.16577 |
| H                                                         | -7.74558 | -0.72416 | -1.48539 | C | 0.63299  | 1.50677  | -2.50971 |
| <b>TS<sub>45</sub></b>                                    |          |          |          | C | 1.32577  | 3.19012  | -0.90888 |
| Sum of electronic and thermal Free Energies: -1669.695232 |          |          |          | C | 0.99863  | 2.3532   | -3.55486 |
| C                                                         | -1.38737 | -0.82293 | 1.96448  | H | 0.19712  | 0.5347   | -2.72225 |
| C                                                         | -1.51406 | -1.70804 | 3.05245  | C | 1.70444  | 4.02627  | -1.95676 |
| H                                                         | -2.06436 | -2.63394 | 2.91764  | H | 1.42625  | 3.5254   | 0.1186   |
| C                                                         | -0.93516 | -1.39661 | 4.27828  | C | 1.54308  | 3.6114   | -3.28275 |
| C                                                         | -0.20248 | -0.2137  | 4.42534  | H | 0.85492  | 2.03414  | -4.58296 |
| H                                                         | 0.24829  | 0.03247  | 5.38182  | H | 2.11488  | 5.0082   | -1.74088 |
| C                                                         | -0.04172 | 0.64757  | 3.33881  | H | 1.83066  | 4.26867  | -4.09753 |
| C                                                         | -0.60794 | 0.35311  | 2.0916   | C | -1.4619  | 2.43345  | 0.8991   |
| H                                                         | 0.53318  | 1.56187  | 3.45598  | C | -1.99035 | 2.91848  | -0.31474 |
| C                                                         | 3.48387  | -0.34533 | -0.86147 | C | -1.92195 | 3.01848  | 2.09632  |
| C                                                         | 3.38742  | -0.02968 | 0.51377  | C | -2.91008 | 3.96328  | -0.32992 |
| C                                                         | 2.96979  | -1.22489 | 1.20766  | H | -1.6995  | 2.45778  | -1.25019 |
| C                                                         | 2.93897  | -2.32899 | 0.2468   | C | -2.82622 | 4.078    | 2.0765   |
| C                                                         | 3.21229  | -1.78108 | -1.02955 | H | -1.56868 | 2.65054  | 3.05218  |
| Rh                                                        | 1.27428  | -0.83338 | -0.1964  | C | -3.3247  | 4.55706  | 0.86401  |
| H                                                         | -1.0556  | -2.07223 | 5.1195   | H | -3.31008 | 4.30902  | -1.27834 |
| C                                                         | 2.68735  | -3.76465 | 0.59049  | H | -3.14877 | 4.52298  | 3.01298  |
| H                                                         | 2.34033  | -4.33238 | -0.27466 | H | -4.03889 | 5.37465  | 0.85028  |
| H                                                         | 3.61199  | -4.23246 | 0.95129  | C | -3.17977 | -1.45166 | 0.55756  |

|                                                           |          |          |          |   |          |          |          |
|-----------------------------------------------------------|----------|----------|----------|---|----------|----------|----------|
| H                                                         | -3.86677 | -1.40918 | 1.41397  | H | 4.59516  | 0.25393  | 2.27462  |
| C                                                         | -3.77128 | -1.88509 | -0.70116 | H | 3.29574  | 1.33653  | 1.77311  |
| C                                                         | -3.01137 | -2.06566 | -1.87358 | C | 4.33562  | 0.86209  | -1.00798 |
| C                                                         | -5.15639 | -2.13268 | -0.72589 | H | 4.06849  | 1.09981  | -2.03923 |
| C                                                         | -3.63818 | -2.47917 | -3.04337 | H | 4.13828  | 1.74183  | -0.3942  |
| H                                                         | -1.94174 | -1.89082 | -1.83829 | H | 5.41661  | 0.66902  | -0.98126 |
| C                                                         | -5.7772  | -2.5455  | -1.90137 | N | -2.14488 | -1.17954 | 0.55082  |
| H                                                         | -5.74258 | -1.99607 | 0.17931  | O | 0.18516  | -1.24958 | -1.8376  |
| C                                                         | -5.0179  | -2.71815 | -3.06092 | C | -0.36694 | 0.94543  | 1.05477  |
| H                                                         | -3.05441 | -2.62225 | -3.94769 | C | 0.64329  | 1.00252  | 0.13957  |
| H                                                         | -6.84615 | -2.73255 | -1.915   | C | 1.1582   | 2.17457  | -0.55896 |
| H                                                         | -5.49921 | -3.042   | -3.97893 | C | 1.23009  | 2.22627  | -1.97101 |
| <b>5</b>                                                  |          |          |          | C | 1.6054   | 3.29414  | 0.18169  |
| Sum of electronic and thermal Free Energies: -1669.703259 |          |          |          | C | 1.71588  | 3.36206  | -2.61297 |
| C                                                         | -1.52515 | -1.16663 | 1.80115  | H | 0.86501  | 1.38362  | -2.55006 |
| C                                                         | -1.77286 | -2.13304 | 2.792    | C | 2.10276  | 4.41934  | -0.46668 |
| H                                                         | -2.47664 | -2.93203 | 2.57883  | H | 1.53533  | 3.27384  | 1.26474  |
| C                                                         | -1.12221 | -2.07596 | 4.02388  | C | 2.16063  | 4.45633  | -1.86473 |
| C                                                         | -0.20646 | -1.05587 | 4.28831  | H | 1.74158  | 3.39896  | -3.69771 |
| H                                                         | 0.28423  | -0.99409 | 5.25465  | H | 2.43504  | 5.27441  | 0.11387  |
| C                                                         | 0.07422  | -0.10919 | 3.2981   | H | 2.54195  | 5.33933  | -2.368   |
| C                                                         | -0.55374 | -0.16467 | 2.04855  | C | -1.42456 | 1.99693  | 1.08271  |
| H                                                         | 0.76748  | 0.70081  | 3.50624  | C | -1.90296 | 2.59155  | -0.10125 |
| C                                                         | 3.61016  | -0.34365 | -0.50679 | C | -1.99723 | 2.38539  | 2.31061  |
| C                                                         | 3.26069  | -0.61415 | 0.85185  | C | -2.9007  | 3.56041  | -0.05511 |
| C                                                         | 2.68883  | -1.92036 | 0.9078   | H | -1.51653 | 2.26576  | -1.05938 |
| C                                                         | 2.7428   | -2.50655 | -0.43216 | C | -2.97396 | 3.37714  | 2.35301  |
| C                                                         | 3.3156   | -1.53337 | -1.3073  | H | -1.66381 | 1.92332  | 3.23306  |
| Rh                                                        | 1.33821  | -0.76473 | -0.62184 | C | -3.4318  | 3.96557  | 1.17186  |
| H                                                         | -1.33871 | -2.82425 | 4.78046  | H | -3.27206 | 3.99259  | -0.97926 |
| C                                                         | 2.36354  | -3.91253 | -0.77831 | H | -3.38505 | 3.68301  | 3.31011  |
| H                                                         | 2.1158   | -4.01333 | -1.83611 | H | -4.20674 | 4.72518  | 1.20607  |
| H                                                         | 3.20156  | -4.58723 | -0.56034 | C | -3.41373 | -1.34502 | 0.44676  |
| H                                                         | 1.505    | -4.2535  | -0.19606 | H | -4.05446 | -1.42017 | 1.33833  |
| C                                                         | 3.67437  | -1.72345 | -2.74748 | C | -4.0998  | -1.40535 | -0.8436  |
| H                                                         | 4.708    | -2.08483 | -2.82323 | C | -3.38282 | -1.40694 | -2.05556 |
| H                                                         | 3.02569  | -2.45509 | -3.23205 | C | -5.50342 | -1.44714 | -0.86919 |
| H                                                         | 3.6108   | -0.7881  | -3.30704 | C | -4.06839 | -1.44488 | -3.26446 |
| C                                                         | 2.26345  | -2.66877 | 2.12597  | H | -2.29752 | -1.38276 | -2.0246  |
| H                                                         | 1.41899  | -3.33008 | 1.92036  | C | -6.18557 | -1.48074 | -2.08396 |
| H                                                         | 3.09729  | -3.29549 | 2.47042  | H | -6.05747 | -1.44649 | 0.06637  |
| H                                                         | 1.97904  | -2.00412 | 2.94015  | C | -5.46847 | -1.47922 | -3.28197 |
| C                                                         | 3.53178  | 0.29665  | 2.01065  | H | -3.51556 | -1.45022 | -4.19931 |
| H                                                         | 2.96013  | 0.00856  | 2.89286  | H | -7.27057 | -1.50812 | -2.09714 |

|                                                           |          |          |          |                                                           |          |          |          |
|-----------------------------------------------------------|----------|----------|----------|-----------------------------------------------------------|----------|----------|----------|
| H                                                         | -5.99797 | -1.50761 | -4.22991 | C                                                         | 2.25137  | 1.55111  | -2.15233 |
| <b>TS<sub>56</sub></b>                                    |          |          |          | C                                                         | 2.6369   | 2.84141  | -0.12473 |
| Sum of electronic and thermal Free Energies: -1669.689583 |          |          |          | C                                                         | 3.16063  | 2.35795  | -2.82956 |
| C                                                         | -1.66022 | -0.13402 | 1.989    | H                                                         | 1.72374  | 0.76051  | -2.67649 |
| C                                                         | -2.12259 | -0.649   | 3.21406  | C                                                         | 3.55849  | 3.62948  | -0.80425 |
| H                                                         | -2.99794 | -1.29153 | 3.21492  | H                                                         | 2.41603  | 3.03748  | 0.91987  |
| C                                                         | -1.4609  | -0.36719 | 4.40823  | C                                                         | 3.82327  | 3.3901   | -2.15772 |
| C                                                         | -0.30965 | 0.42248  | 4.40275  | H                                                         | 3.35276  | 2.1857   | -3.88415 |
| H                                                         | 0.20604  | 0.65241  | 5.32971  | H                                                         | 4.06551  | 4.43719  | -0.28556 |
| C                                                         | 0.17232  | 0.92449  | 3.19034  | H                                                         | 4.53899  | 4.0111   | -2.68764 |
| C                                                         | -0.4819  | 0.6518   | 1.98225  | C                                                         | -0.80737 | 2.58559  | 0.3883   |
| H                                                         | 1.0497   | 1.56482  | 3.18304  | C                                                         | -0.92956 | 3.01064  | -0.95181 |
| C                                                         | 3.35466  | -1.9494  | 0.20981  | C                                                         | -1.47578 | 3.32148  | 1.38993  |
| C                                                         | 2.97838  | -1.61188 | 1.55598  | C                                                         | -1.66661 | 4.14535  | -1.27164 |
| C                                                         | 1.85518  | -2.40441 | 1.90608  | H                                                         | -0.47584 | 2.42753  | -1.74382 |
| C                                                         | 1.55897  | -3.30881 | 0.79016  | C                                                         | -2.19527 | 4.46783  | 1.06496  |
| C                                                         | 2.502    | -3.04775 | -0.24679 | H                                                         | -1.41163 | 3.00687  | 2.42502  |
| Rh                                                        | 1.21614  | -1.23931 | -0.06734 | C                                                         | -2.29439 | 4.884    | -0.26469 |
| H                                                         | -1.84297 | -0.76869 | 5.34207  | H                                                         | -1.76225 | 4.44809  | -2.3097  |
| C                                                         | 0.52287  | -4.38783 | 0.80742  | H                                                         | -2.68433 | 5.03438  | 1.85136  |
| H                                                         | 0.2463   | -4.69541 | -0.20226 | H                                                         | -2.86727 | 5.77121  | -0.51655 |
| H                                                         | 0.91258  | -5.2685  | 1.33427  | C                                                         | -3.53546 | -0.4532  | 0.64119  |
| H                                                         | -0.38389 | -4.06808 | 1.32519  | H                                                         | -4.18616 | -0.15081 | 1.47546  |
| C                                                         | 2.65545  | -3.80175 | -1.53078 | C                                                         | -4.22128 | -0.84112 | -0.58879 |
| H                                                         | 3.32598  | -4.65721 | -1.38101 | C                                                         | -3.50939 | -1.2086  | -1.74753 |
| H                                                         | 1.69724  | -4.18107 | -1.8899  | C                                                         | -5.62657 | -0.84548 | -0.60814 |
| H                                                         | 3.08548  | -3.1771  | -2.31609 | C                                                         | -4.2026  | -1.57531 | -2.89564 |
| C                                                         | 1.15607  | -2.45219 | 3.22361  | H                                                         | -2.42362 | -1.1921  | -1.73149 |
| H                                                         | 0.08832  | -2.6458  | 3.10484  | C                                                         | -6.31512 | -1.21697 | -1.76093 |
| H                                                         | 1.57326  | -3.27085 | 3.82554  | H                                                         | -6.17638 | -0.55843 | 0.28495  |
| H                                                         | 1.27155  | -1.52549 | 3.78503  | C                                                         | -5.60311 | -1.58264 | -2.90518 |
| C                                                         | 3.71043  | -0.64208 | 2.43307  | H                                                         | -3.65403 | -1.85514 | -3.79017 |
| H                                                         | 3.10556  | -0.33464 | 3.28608  | H                                                         | -7.40062 | -1.22048 | -1.76856 |
| H                                                         | 4.62412  | -1.10867 | 2.82094  | H                                                         | -6.13735 | -1.87101 | -3.80573 |
| H                                                         | 4.00933  | 0.25442  | 1.88375  | <b>7</b>                                                  |          |          |          |
| C                                                         | 4.55632  | -1.43656 | -0.51452 | Sum of electronic and thermal Free Energies: -1669.813040 |          |          |          |
| H                                                         | 4.42028  | -1.45562 | -1.59724 | C                                                         | -0.81148 | -0.38028 | 2.15621  |
| H                                                         | 4.80413  | -0.41576 | -0.21996 | C                                                         | -1.41588 | -0.9474  | 3.29468  |
| H                                                         | 5.41956  | -2.07273 | -0.27676 | H                                                         | -2.49903 | -0.95301 | 3.36996  |
| N                                                         | -2.25569 | -0.44305 | 0.76301  | C                                                         | -0.61846 | -1.51085 | 4.27404  |
| O                                                         | 0.19847  | -0.22523 | -1.03718 | C                                                         | 0.78383  | -1.5144  | 4.12419  |
| C                                                         | -0.03113 | 1.37104  | 0.74411  | H                                                         | 1.40431  | -1.94307 | 4.9051   |
| C                                                         | 1.02015  | 0.96753  | -0.03936 | C                                                         | 1.38592  | -0.96423 | 3.00739  |
| C                                                         | 1.9641   | 1.78417  | -0.7853  | C                                                         | 0.61251  | -0.35951 | 1.97498  |

|    |          |          |          |                                                           |          |          |          |
|----|----------|----------|----------|-----------------------------------------------------------|----------|----------|----------|
| H  | 2.46395  | -0.96051 | 2.92561  | C                                                         | 0.85142  | 2.67574  | 1.64592  |
| C  | 0.42168  | -1.6614  | -2.15999 | C                                                         | 0.07658  | 2.24788  | -0.59103 |
| C  | 0.95299  | -2.67316 | -1.28578 | C                                                         | 0.46123  | 4.01274  | 1.52363  |
| C  | -0.16331 | -3.43486 | -0.74554 | H                                                         | 1.30476  | 2.33411  | 2.57237  |
| C  | -1.37059 | -2.86963 | -1.22719 | C                                                         | -0.30078 | 3.58246  | -0.72426 |
| C  | -1.01644 | -1.73482 | -2.07235 | H                                                         | -0.1081  | 1.54996  | -1.40274 |
| Rh | -0.25475 | -1.21635 | -0.07871 | C                                                         | -0.11013 | 4.4731   | 0.3364   |
| H  | -1.07303 | -1.95232 | 5.15593  | H                                                         | 0.60946  | 4.69523  | 2.35636  |
| C  | -2.75934 | -3.39044 | -1.00998 | H                                                         | -0.7562  | 3.92313  | -1.64977 |
| H  | -3.49278 | -2.58265 | -0.95542 | H                                                         | -0.40626 | 5.51267  | 0.23699  |
| H  | -3.05562 | -4.03967 | -1.84366 | C                                                         | -2.38868 | 1.08523  | 1.212    |
| H  | -2.83381 | -3.97928 | -0.09322 | H                                                         | -2.29895 | 1.67526  | 2.13315  |
| C  | -1.98634 | -0.9293  | -2.87909 | C                                                         | -3.44064 | 1.50908  | 0.29078  |
| H  | -2.29355 | -1.50182 | -3.76334 | C                                                         | -4.29058 | 0.57122  | -0.32479 |
| H  | -2.88644 | -0.68667 | -2.31161 | C                                                         | -3.70936 | 2.88692  | 0.15147  |
| H  | -1.54671 | 0.00738  | -3.22796 | C                                                         | -5.3834  | 1.00489  | -1.07347 |
| C  | -0.01209 | -4.63377 | 0.13665  | H                                                         | -4.12876 | -0.48433 | -0.14657 |
| H  | -0.92468 | -4.85394 | 0.69399  | C                                                         | -4.77781 | 3.31573  | -0.63076 |
| H  | 0.22654  | -5.51486 | -0.4733  | H                                                         | -3.06278 | 3.61174  | 0.6384   |
| H  | 0.80697  | -4.50353 | 0.84884  | C                                                         | -5.6239  | 2.37699  | -1.23326 |
| C  | 2.38841  | -3.07838 | -1.16589 | H                                                         | -6.06379 | 0.27837  | -1.51036 |
| H  | 2.65989  | -3.31799 | -0.13702 | H                                                         | -4.96292 | 4.37326  | -0.75774 |
| H  | 2.5616   | -3.9679  | -1.78499 | H                                                         | -6.47929 | 2.71317  | -1.81051 |
| H  | 3.0655   | -2.29399 | -1.50247 | <b>8</b>                                                  |          |          |          |
| C  | 1.21323  | -0.79365 | -3.08968 | Sum of electronic and thermal Free Energies: -2016.692391 |          |          |          |
| H  | 0.67459  | 0.11837  | -3.35593 | C                                                         | -0.99767 | -0.03817 | 2.14782  |
| H  | 2.1781   | -0.50768 | -2.66711 | C                                                         | -1.47355 | -0.7063  | 3.27883  |
| H  | 1.40968  | -1.34062 | -4.02117 | H                                                         | -2.54125 | -0.87991 | 3.36601  |
| N  | -1.59468 | 0.08228  | 1.07483  | C                                                         | -0.60603 | -1.19726 | 4.25145  |
| O  | 3.02828  | -1.06584 | 0.8204   | C                                                         | 0.76427  | -1.02764 | 4.07648  |
| C  | 1.11612  | 0.33242  | 0.74788  | H                                                         | 1.46328  | -1.40039 | 4.81875  |
| C  | 2.56578  | 0.00787  | 0.43016  | C                                                         | 1.25372  | -0.36254 | 2.95657  |
| C  | 3.52399  | 0.94548  | -0.25643 | C                                                         | 0.41151  | 0.17807  | 1.94184  |
| C  | 4.86934  | 0.83045  | 0.14977  | H                                                         | 2.31234  | -0.18709 | 2.86437  |
| C  | 3.21576  | 1.83587  | -1.29791 | C                                                         | 3.20717  | -1.25411 | -0.86583 |
| C  | 5.8667   | 1.59382  | -0.44808 | C                                                         | 3.08054  | -2.07139 | 0.3066   |
| H  | 5.11559  | 0.1324   | 0.94117  | C                                                         | 2.15631  | -3.17213 | 0.01077  |
| C  | 4.22268  | 2.58062  | -1.91454 | C                                                         | 1.66261  | -2.97536 | -1.28991 |
| H  | 2.1986   | 1.95168  | -1.643   | C                                                         | 2.22777  | -1.72708 | -1.81213 |
| C  | 5.54765  | 2.46716  | -1.48984 | Rh                                                        | 1.11098  | -1.09414 | -0.0518  |
| H  | 6.89451  | 1.49889  | -0.11044 | H                                                         | -1.00036 | -1.71633 | 5.11922  |
| H  | 3.96784  | 3.2501   | -2.73024 | C                                                         | 0.779    | -3.89237 | -2.07097 |
| H  | 6.32629  | 3.05468  | -1.96794 | H                                                         | 0.06762  | -3.3402  | -2.69041 |
| C  | 0.67089  | 1.77204  | 0.58766  | H                                                         | 1.39521  | -4.49498 | -2.75087 |

|   |          |          |          |                                                           |          |          |          |
|---|----------|----------|----------|-----------------------------------------------------------|----------|----------|----------|
| H | 0.22329  | -4.57024 | -1.42454 | H                                                         | -3.03952 | 1.36812  | 2.55309  |
| C | 2.02731  | -1.21728 | -3.20466 | C                                                         | -4.10012 | 1.44505  | 0.6736   |
| H | 2.67067  | -1.76745 | -3.90417 | C                                                         | -4.11962 | 1.28474  | -0.72572 |
| H | 0.99431  | -1.35109 | -3.53464 | C                                                         | -5.20093 | 2.05059  | 1.31084  |
| H | 2.27994  | -0.1582  | -3.28542 | C                                                         | -5.22026 | 1.70932  | -1.46038 |
| C | 1.84105  | -4.30131 | 0.93859  | H                                                         | -3.26025 | 0.85771  | -1.22688 |
| H | 0.86631  | -4.73678 | 0.71865  | C                                                         | -6.30463 | 2.46643  | 0.57221  |
| H | 2.60375  | -5.08621 | 0.85289  | H                                                         | -5.18738 | 2.18791  | 2.38879  |
| H | 1.82881  | -3.96701 | 1.97856  | C                                                         | -6.31532 | 2.29498  | -0.81403 |
| C | 3.97207  | -2.00729 | 1.50528  | H                                                         | -5.22846 | 1.59015  | -2.53927 |
| H | 3.49832  | -2.44515 | 2.38584  | H                                                         | -7.15083 | 2.92581  | 1.07261  |
| H | 4.88353  | -2.58519 | 1.30089  | H                                                         | -7.17299 | 2.62292  | -1.3934  |
| H | 4.26395  | -0.98188 | 1.73449  | H                                                         | -1.60531 | -0.4347  | 0.00606  |
| C | 4.28324  | -0.24835 | -1.11582 | O                                                         | -1.18155 | -1.10248 | -0.60589 |
| H | 4.0123   | 0.46859  | -1.89109 | C                                                         | -1.70947 | -2.35686 | -0.41206 |
| H | 4.54887  | 0.30317  | -0.21235 | O                                                         | -1.19304 | -3.13211 | 0.36579  |
| H | 5.18031  | -0.78343 | -1.45534 | C                                                         | -2.9792  | -2.71214 | -1.2106  |
| N | -1.95635 | 0.33641  | 1.16173  | C                                                         | -4.19264 | -2.32262 | -0.32864 |
| O | 3.19655  | 1.11318  | 1.6735   | H                                                         | -4.23654 | -1.24905 | -0.13266 |
| C | 0.95573  | 0.94355  | 0.75491  | H                                                         | -5.11799 | -2.60165 | -0.84226 |
| C | 2.36476  | 1.50985  | 0.85211  | H                                                         | -4.16294 | -2.85314 | 0.6277   |
| C | 2.82638  | 2.6321   | -0.04995 | C                                                         | -3.01549 | -4.23643 | -1.43937 |
| C | 3.68942  | 3.57374  | 0.53756  | H                                                         | -3.95736 | -4.51077 | -1.92397 |
| C | 2.55116  | 2.7408   | -1.42228 | H                                                         | -2.1997  | -4.56609 | -2.0896  |
| C | 4.22911  | 4.6146   | -0.21432 | H                                                         | -2.93879 | -4.77883 | -0.49531 |
| H | 3.92944  | 3.47696  | 1.5907   | C                                                         | -3.03915 | -1.98006 | -2.56305 |
| C | 3.11616  | 3.76541  | -2.18083 | H                                                         | -2.1894  | -2.2466  | -3.20054 |
| H | 1.90523  | 2.02035  | -1.90665 | H                                                         | -3.95163 | -2.26716 | -3.09495 |
| C | 3.94658  | 4.71236  | -1.57817 | H                                                         | -3.04064 | -0.89496 | -2.44733 |
| H | 4.87743  | 5.3436   | 0.26231  |                                                           |          |          |          |
| H | 2.90325  | 3.8267   | -3.24405 | <b>TS<sub>89</sub></b>                                    |          |          |          |
| H | 4.37365  | 5.51748  | -2.16849 | Sum of electronic and thermal Free Energies: -2016.692123 |          |          |          |
| C | 0.01843  | 1.9727   | 0.13845  | C                                                         | -1.00601 | -0.04888 | 2.13549  |
| C | -0.25987 | 3.13141  | 0.88264  | C                                                         | -1.47775 | -0.73187 | 3.25956  |
| C | -0.49647 | 1.88482  | -1.16105 | H                                                         | -2.54494 | -0.9086  | 3.34642  |
| C | -1.02041 | 4.16905  | 0.34486  | C                                                         | -0.60838 | -1.23306 | 4.22558  |
| H | 0.13654  | 3.22659  | 1.89069  | C                                                         | 0.76131  | -1.05894 | 4.05245  |
| C | -1.24707 | 2.9288   | -1.70865 | H                                                         | 1.46156  | -1.43901 | 4.78979  |
| H | -0.29964 | 0.9955   | -1.75179 | C                                                         | 1.24807  | -0.3785  | 2.94048  |
| C | -1.51011 | 4.07575  | -0.9599  | C                                                         | 0.4039   | 0.17255  | 1.93239  |
| H | -1.21479 | 5.05778  | 0.93821  | H                                                         | 2.3058   | -0.19692 | 2.85116  |
| H | -1.62079 | 2.84589  | -2.72548 | C                                                         | 3.22111  | -1.23748 | -0.85991 |
| H | -2.08879 | 4.88889  | -1.38717 | C                                                         | 3.09746  | -2.05452 | 0.31391  |
| C | -2.98809 | 1.03357  | 1.51338  | C                                                         | 2.18054  | -3.16109 | 0.01834  |
|   |          |          |          | C                                                         | 1.68696  | -2.96761 | -1.28294 |

|    |          |          |          |                                                           |          |          |          |
|----|----------|----------|----------|-----------------------------------------------------------|----------|----------|----------|
| C  | 2.24703  | -1.71729 | -1.80696 | H                                                         | -0.29257 | 0.98795  | -1.75939 |
| Rh | 1.12374  | -1.08887 | -0.04649 | C                                                         | -1.52513 | 4.06257  | -0.98044 |
| H  | -1.00147 | -1.76301 | 5.08737  | H                                                         | -1.24495 | 5.05083  | 0.91669  |
| C  | 0.81017  | -3.8908  | -2.06466 | H                                                         | -1.61978 | 2.82785  | -2.74364 |
| H  | 0.10016  | -3.34395 | -2.69044 | H                                                         | -2.10624 | 4.87136  | -1.41263 |
| H  | 1.43226  | -4.49371 | -2.73893 | C                                                         | -2.99891 | 1.02003  | 1.51956  |
| H  | 0.2536   | -4.56839 | -1.4186  | H                                                         | -3.05034 | 1.34496  | 2.56279  |
| C  | 2.04533  | -1.21073 | -3.20059 | C                                                         | -4.11731 | 1.43265  | 0.68707  |
| H  | 2.68877  | -1.76135 | -3.89964 | C                                                         | -4.13898 | 1.28725  | -0.71364 |
| H  | 1.01224  | -1.34626 | -3.5297  | C                                                         | -5.22184 | 2.02123  | 1.33311  |
| H  | 2.29643  | -0.15146 | -3.28354 | C                                                         | -5.2453  | 1.70939  | -1.44131 |
| C  | 1.87051  | -4.29178 | 0.94636  | H                                                         | -3.27604 | 0.87499  | -1.22113 |
| H  | 0.89861  | -4.73313 | 0.72504  | C                                                         | -6.33138 | 2.43467  | 0.60159  |
| H  | 2.6373   | -5.07282 | 0.86222  | H                                                         | -5.20689 | 2.1472   | 2.41246  |
| H  | 1.85469  | -3.9572  | 1.98621  | C                                                         | -6.34425 | 2.27783  | -0.78627 |
| C  | 3.9886   | -1.98331 | 1.51259  | H                                                         | -5.25483 | 1.60215  | -2.52147 |
| H  | 3.52127  | -2.43104 | 2.39157  | H                                                         | -7.18042 | 2.88096  | 1.109    |
| H  | 4.90766  | -2.54799 | 1.30531  | H                                                         | -7.20635 | 2.60403  | -1.36003 |
| H  | 4.26737  | -0.95501 | 1.74577  | H                                                         | -1.62768 | -0.41197 | 0.01782  |
| C  | 4.29094  | -0.22439 | -1.10719 | O                                                         | -1.13967 | -1.16102 | -0.65822 |
| H  | 4.01774  | 0.4897   | -1.88426 | C                                                         | -1.67262 | -2.41929 | -0.47063 |
| H  | 4.54912  | 0.33027  | -0.20343 | O                                                         | -1.15493 | -3.19711 | 0.30152  |
| H  | 5.19337  | -0.75311 | -1.44244 | C                                                         | -2.93998 | -2.7663  | -1.27442 |
| N  | -1.96626 | 0.33196  | 1.1548   | C                                                         | -4.1552  | -2.3815  | -0.39267 |
| O  | 3.18293  | 1.13459  | 1.68884  | H                                                         | -4.19847 | -1.30919 | -0.18978 |
| C  | 0.94975  | 0.94909  | 0.75441  | H                                                         | -5.07912 | -2.65632 | -0.91103 |
| C  | 2.35456  | 1.52476  | 0.86102  | H                                                         | -4.12873 | -2.91853 | 0.5601   |
| C  | 2.81473  | 2.6488   | -0.03937 | C                                                         | -2.97558 | -4.28895 | -1.51446 |
| C  | 3.66925  | 3.59584  | 0.55198  | H                                                         | -3.91507 | -4.55919 | -2.00578 |
| C  | 2.54609  | 2.75493  | -1.41321 | H                                                         | -2.15636 | -4.61391 | -2.16281 |
| C  | 4.20681  | 4.63926  | -0.19784 | H                                                         | -2.90401 | -4.83839 | -0.57405 |
| H  | 3.90418  | 3.50123  | 1.60647  | C                                                         | -2.99487 | -2.02325 | -2.62113 |
| C  | 3.10901  | 3.78229  | -2.16951 | H                                                         | -2.14217 | -2.28365 | -3.25721 |
| H  | 1.90704  | 2.03025  | -1.90038 | H                                                         | -3.9049  | -2.30712 | -3.15882 |
| C  | 3.93077  | 4.73447  | -1.56321 | H                                                         | -2.99859 | -0.93909 | -2.49633 |
| H  | 4.84837  | 5.37235  | 0.28165  | <b>9</b>                                                  |          |          |          |
| H  | 2.90123  | 3.84167  | -3.23386 | Sum of electronic and thermal Free Energies: -2016.726645 |          |          |          |
| H  | 4.35615  | 5.54171  | -2.15184 | C                                                         | 0.57066  | 1.14279  | 2.25285  |
| C  | 0.00937  | 1.97074  | 0.13084  | C                                                         | -0.22723 | 1.47713  | 3.34669  |
| C  | -0.27908 | 3.12971  | 0.87068  | H                                                         | -0.84236 | 2.37033  | 3.30687  |
| C  | -0.49817 | 1.87695  | -1.17114 | C                                                         | -0.22294 | 0.66266  | 4.47628  |
| C  | -1.04253 | 4.16183  | 0.32645  | C                                                         | 0.55628  | -0.49489 | 4.47775  |
| H  | 0.11146  | 3.22954  | 1.88057  | H                                                         | 0.55293  | -1.15193 | 5.34221  |
| C  | -1.25189 | 2.91523  | -1.72504 | C                                                         | 1.33343  | -0.82479 | 3.36679  |



|    |          |          |          |                                                           |            |            |             |
|----|----------|----------|----------|-----------------------------------------------------------|------------|------------|-------------|
| C  | 1.38519  | -0.00845 | 2.22127  | C                                                         | 3.69103    | -0.40748   | 1.13949     |
| H  | 1.89497  | -1.75237 | 3.37255  | C                                                         | 4.37107    | -0.7229    | 2.3335      |
| C  | -1.64692 | -3.04214 | -1.02592 | C                                                         | 4.48076    | 0.00477    | 0.04049     |
| C  | -1.58642 | -3.05117 | 0.39777  | C                                                         | 5.7648     | -0.67197   | 2.40886     |
| C  | -2.77658 | -2.36142 | 0.89958  | H                                                         | 3.8194     | -1.00141   | 3.22168     |
| C  | -3.59614 | -1.99339 | -0.22508 | C                                                         | 5.86996    | 0.03859    | 0.11557     |
| C  | -2.87425 | -2.34906 | -1.41067 | H                                                         | 3.99632    | 0.30998    | -0.88346    |
| Rh | -1.58581 | -0.97123 | -0.28097 | C                                                         | 6.52485    | -0.3028    | 1.2996      |
| H  | -0.83064 | 0.92403  | 5.33598  | H                                                         | 6.25351    | -0.92162   | 3.34368     |
| C  | -4.97157 | -1.40701 | -0.16424 | H                                                         | 6.44268    | 0.35       | -0.75378    |
| H  | -5.22355 | -0.87746 | -1.0861  | H                                                         | 7.60953    | -0.26762   | 1.35926     |
| H  | -5.70383 | -2.21481 | -0.03725 | C                                                         | 1.49842    | 2.64816    | 0.62649     |
| H  | -5.06795 | -0.70891 | 0.66669  | H                                                         | 2.36326    | 2.7048     | 1.28419     |
| C  | -3.33094 | -2.1355  | -2.81806 | C                                                         | 1.56617    | 3.32342    | -0.64775    |
| H  | -3.88977 | -3.01572 | -3.16177 | C                                                         | 0.62669    | 3.10655    | -1.67773    |
| H  | -3.99111 | -1.2699  | -2.90108 | C                                                         | 2.63991    | 4.21371    | -0.85358    |
| H  | -2.48778 | -1.99519 | -3.49825 | C                                                         | 0.76756    | 3.78132    | -2.88228    |
| C  | -3.13416 | -2.16162 | 2.33533  | H                                                         | -0.18804   | 2.40263    | -1.53627    |
| H  | -3.60277 | -1.18581 | 2.47287  | C                                                         | 2.76086    | 4.89619    | -2.05821    |
| H  | -3.83815 | -2.94277 | 2.65204  | H                                                         | 3.36256    | 4.37398    | -0.05728    |
| H  | -2.25481 | -2.22018 | 2.98015  | C                                                         | 1.82684    | 4.67759    | -3.07217    |
| C  | -0.53323 | -3.69124 | 1.24586  | H                                                         | 0.05785    | 3.60738    | -3.68582    |
| H  | -0.35053 | -3.11628 | 2.15661  | H                                                         | 3.58117    | 5.58959    | -2.2094     |
| H  | -0.85781 | -4.69645 | 1.54594  | H                                                         | 1.92666    | 5.2029     | -4.01912    |
| H  | 0.41209  | -3.78947 | 0.70707  | H                                                         | -0.35801   | 1.80127    | 0.49802     |
| C  | -0.69339 | -3.6961  | -1.97498 | O                                                         | -1.98368   | 1.1097     | -0.15996    |
| H  | -0.56493 | -3.11297 | -2.8892  | C                                                         | -3.06322   | 1.55119    | 0.47245     |
| H  | 0.29379  | -3.83448 | -1.53294 | O                                                         | -3.63893   | 0.91475    | 1.34865     |
| H  | -1.08131 | -4.68293 | -2.25877 | C                                                         | -3.55574   | 2.9566     | 0.0437      |
| N  | 0.48771  | 1.96899  | 1.07654  | C                                                         | -2.55671   | 4.01553    | 0.56106     |
| O  | 0.26796  | -0.208   | -0.27542 | H                                                         | -1.56879   | 3.9027     | 0.10479     |
| C  | 2.20417  | -0.39743 | 1.02798  | H                                                         | -2.91854   | 5.01914    | 0.31508     |
| C  | 1.51723  | -0.65556 | -0.14434 | H                                                         | -2.45041   | 3.96254    | 1.65016     |
| C  | 2.06111  | -1.3857  | -1.32617 | C                                                         | -4.9388    | 3.22002    | 0.66251     |
| C  | 2.85609  | -2.53499 | -1.17332 | H                                                         | -5.29573   | 4.21395    | 0.37021     |
| C  | 1.70965  | -0.97604 | -2.62326 | H                                                         | -5.67196   | 2.48135    | 0.32305     |
| C  | 3.29603  | -3.24728 | -2.28883 | H                                                         | -4.90126   | 3.16892    | 1.75322     |
| H  | 3.13273  | -2.86386 | -0.17634 | C                                                         | -3.64531   | 3.03648    | -1.49418    |
| C  | 2.162    | -1.68192 | -3.73913 | H                                                         | -4.36281   | 2.30795    | -1.88729    |
| H  | 1.0918   | -0.09231 | -2.74805 | H                                                         | -3.98591   | 4.03159    | -1.79868    |
| C  | 2.95406  | -2.82122 | -3.5758  | H                                                         | -2.67695   | 2.84447    | -1.96265    |
| H  | 3.90762  | -4.13467 | -2.15367 | <b>TS<sub>910</sub></b>                                   |            |            |             |
| H  | 1.89956  | -1.34109 | -4.73696 | Sum of electronic and thermal Free Energies: -2016.710387 |            |            |             |
| H  | 3.30424  | -3.37246 | -4.44373 | C                                                         | 0.76081439 | 0.93758835 | -2.58841600 |

|    |             |             |             |   |             |             |             |
|----|-------------|-------------|-------------|---|-------------|-------------|-------------|
| C  | -0.03853361 | 1.02739835  | -3.72335600 | C | 1.23490808  | -1.81243253 | 3.62964548  |
| H  | -0.61211861 | 1.92843435  | -3.91465300 | H | 0.05114827  | -2.02482652 | 1.83882002  |
| C  | -0.07209461 | -0.05262965 | -4.61092400 | C | 2.45934917  | -1.39972771 | 4.16386335  |
| C  | 0.68278739  | -1.19808865 | -4.35234900 | H | 4.39630711  | -0.55148694 | 3.73700164  |
| H  | 0.66209039  | -2.03054865 | -5.04938500 | H | 0.46206429  | -2.20699034 | 4.28276923  |
| C  | 1.47888039  | -1.27780665 | -3.20134300 | H | 2.64267988  | -1.48339102 | 5.23086986  |
| C  | 1.54094339  | -0.20177865 | -2.31460900 | C | 3.79237386  | -0.26218736 | -1.00682028 |
| H  | 2.05106039  | -2.17966465 | -3.00472100 | C | 4.45220306  | -1.49937160 | -1.12744342 |
| C  | 2.22050782  | -5.26962780 | -0.56682805 | C | 4.59124533  | 0.90117868  | -1.01372729 |
| C  | 1.83276162  | -5.17077421 | -1.93434954 | C | 5.84423794  | -1.57407997 | -1.20515268 |
| C  | 0.49534913  | -5.74948331 | -2.07945376 | H | 3.87976115  | -2.41767703 | -1.17038421 |
| C  | 0.06655205  | -6.20487164 | -0.78972162 | C | 5.98010243  | 0.82429872  | -1.08872467 |
| C  | 1.10914110  | -5.85914941 | 0.15685835  | H | 4.12555570  | 1.87790282  | -0.96802705 |
| Rh | 0.38096018  | -4.02308137 | -0.73625133 | C | 6.61763079  | -0.41510799 | -1.17777480 |
| H  | -0.67847061 | 0.00895835  | -5.50921600 | H | 6.32031157  | -2.54631875 | -1.29153217 |
| C  | -1.17289486 | -6.98363274 | -0.48825392 | H | 6.56514801  | 1.73942195  | -1.08666301 |
| H  | -1.47479171 | -6.87212367 | 0.55533445  | H | 7.70001958  | -0.47369126 | -1.23717729 |
| H  | -0.97892669 | -8.04942798 | -0.66495864 | C | 1.33788646  | 1.50609741  | -0.37245155 |
| H  | -2.00060786 | -6.66392080 | -1.12056504 | H | 2.24748629  | 2.06914850  | -0.17245223 |
| C  | 1.09331120  | -6.15150322 | 1.62108036  | C | 0.36382395  | 1.52764676  | 0.73307855  |
| H  | 1.56592487  | -7.12571943 | 1.80390538  | C | -0.94458124 | 1.02297354  | 0.60209069  |
| H  | 0.07585131  | -6.19858374 | 2.01327159  | C | 0.75371645  | 2.09650855  | 1.95929158  |
| H  | 1.65140405  | -5.40195253 | 2.18636148  | C | -1.83206580 | 1.09333789  | 1.67439820  |
| C  | -0.24476839 | -5.91505852 | -3.36408888 | H | -1.27075488 | 0.57398102  | -0.33076235 |
| H  | -1.30736903 | -5.71867931 | -3.21584530 | C | -0.13701299 | 2.15854002  | 3.02925222  |
| H  | -0.11768454 | -6.94413311 | -3.72565941 | H | 1.75633897  | 2.49896615  | 2.06599285  |
| H  | 0.13392567  | -5.24073757 | -4.13451644 | C | -1.43256638 | 1.65770748  | 2.88925508  |
| C  | 2.65064932  | -4.62791583 | -3.06135549 | H | -2.84330871 | 0.71380459  | 1.55999788  |
| H  | 2.05788821  | -3.98558034 | -3.71791310 | H | 0.17645935  | 2.60749250  | 3.96656812  |
| H  | 3.03681913  | -5.45745313 | -3.66694016 | H | -2.13081111 | 1.71458862  | 3.71880580  |
| H  | 3.50350640  | -4.05155992 | -2.70004746 | H | -0.02595061 | 2.00511335  | -1.02641100 |
| C  | 3.54196886  | -4.89444701 | 0.02547061  | O | -1.45453192 | -3.16203583 | -0.44417926 |
| H  | 3.44417358  | -4.53090950 | 1.04976679  | C | -2.58270995 | -3.71783235 | -0.87115515 |
| H  | 4.04525631  | -4.12019469 | -0.55464820 | O | -2.61942048 | -4.57944513 | -1.74352068 |
| H  | 4.19395251  | -5.77693240 | 0.04391527  | C | -3.86760343 | -3.18933846 | -0.19262057 |
| N  | 0.82699939  | 1.93624335  | -1.58008100 | C | -4.05312070 | -1.69411142 | -0.53268836 |
| O  | 0.97506986  | -2.02955913 | -0.54440193 | H | -3.25732658 | -1.07511343 | -0.11129887 |
| C  | 2.29500139  | -0.17516065 | -0.99917500 | H | -5.00093945 | -1.33685073 | -0.11730099 |
| C  | 1.75638460  | -1.14718361 | -0.06024318 | H | -4.08644410 | -1.53257519 | -1.61552898 |
| C  | 1.97841060  | -1.16054531 | 1.41230330  | C | -5.07621973 | -3.98514091 | -0.71235110 |
| C  | 3.20199359  | -0.73723663 | 1.95864082  | H | -5.99189834 | -3.62210061 | -0.23463734 |
| C  | 1.00110121  | -1.71165659 | 2.25850599  | H | -4.97472377 | -5.05158015 | -0.49384803 |
| C  | 3.44405987  | -0.87098237 | 3.32508410  | H | -5.18517121 | -3.87981276 | -1.79439470 |
| H  | 3.96112173  | -0.30787884 | 1.31396335  | C | -3.74115089 | -3.36566912 | 1.33614997  |

|                                                           |             |             |             |    |             |             |             |
|-----------------------------------------------------------|-------------|-------------|-------------|----|-------------|-------------|-------------|
| H                                                         | -3.62720680 | -4.42195773 | 1.60511297  | H  | -2.31730200 | -4.46808100 | 1.58611600  |
| H                                                         | -4.64534664 | -2.99546071 | 1.83021205  | H  | -2.61986700 | -4.03964900 | 4.01717700  |
| H                                                         | -2.88394876 | -2.81638213 | 1.73344658  | H  | -3.40757100 | -1.80763400 | 4.78285000  |
| <b>10</b>                                                 |             |             |             | H  | -3.85578600 | -0.02020400 | 3.13848500  |
| Sum of electronic and thermal Free Energies: -2016.728943 |             |             |             | H  | -2.38517300 | 2.47160000  | 1.55277300  |
| C                                                         | -0.89443600 | 0.90507100  | 1.68957300  | H  | -1.97212700 | 3.34719500  | 3.81225300  |
| C                                                         | -3.88493100 | 2.57431300  | -0.87634600 | H  | -0.25294200 | 2.30018200  | 5.26935500  |
| C                                                         | -4.02448700 | 3.89894800  | -1.29626700 | H  | 1.04448500  | 0.34673600  | 4.44580300  |
| C                                                         | -2.90515500 | 4.65155500  | -1.65212900 | H  | 0.62843600  | -0.54231700 | 2.17826100  |
| C                                                         | -1.63967800 | 4.06565400  | -1.59737300 | N  | -4.56171200 | -0.57729600 | -0.63077600 |
| C                                                         | -1.49614000 | 2.74130500  | -1.18386500 | O  | -0.22390800 | -0.35153200 | -0.21511100 |
| C                                                         | -2.53817300 | -0.32256700 | -1.71118100 | C  | 1.68535300  | -2.94062200 | -0.72024800 |
| C                                                         | -1.67075400 | -0.43868200 | -2.79267400 | C  | 2.36339300  | -2.78811000 | 0.52783200  |
| C                                                         | -2.06702800 | -1.18330400 | -3.91143800 | C  | 3.60917800  | -2.04897300 | 0.29481300  |
| C                                                         | -3.33230900 | -1.77966800 | -3.94527600 | C  | 3.67760700  | -1.73409700 | -1.09819500 |
| C                                                         | -4.22524800 | -1.63856100 | -2.88047500 | C  | 2.46397400  | -2.25101300 | -1.72100400 |
| C                                                         | -1.64300100 | 1.99367800  | 2.17886000  | Rh | 1.89853500  | -0.77710900 | -0.23394400 |
| C                                                         | -3.81619900 | -0.89670800 | -1.76931500 | C  | 4.82245000  | -1.08081200 | -1.80059400 |
| C                                                         | -3.65242200 | -0.09924100 | 0.42577100  | H  | 4.52885700  | -0.69479500 | -2.77862200 |
| C                                                         | -3.31245400 | -1.20591300 | 1.42359600  | H  | 5.61921000  | -1.81882600 | -1.95946800 |
| C                                                         | -2.87899800 | -2.47400700 | 1.00117200  | H  | 5.21715700  | -0.25679900 | -1.20500700 |
| C                                                         | -2.62653100 | -3.48458400 | 1.93048700  | C  | 2.11954300  | -2.15509600 | -3.17004600 |
| C                                                         | -2.80454400 | -3.24844100 | 3.29668600  | H  | 2.55861200  | -3.00932800 | -3.70280100 |
| C                                                         | -3.24694200 | -1.99678400 | 3.72574700  | H  | 2.51976000  | -1.24515400 | -3.62202800 |
| C                                                         | -3.50236400 | -0.98851700 | 2.79464300  | H  | 1.03984600  | -2.18223900 | -3.33060200 |
| C                                                         | -1.40305000 | 2.49445700  | 3.45600900  | C  | 4.66423900  | -1.74804400 | 1.30670300  |
| C                                                         | -0.43290900 | 1.90910400  | 4.27256000  | H  | 5.03199000  | -0.72890700 | 1.17191000  |
| C                                                         | 0.30244400  | 0.81533600  | 3.80689000  | H  | 5.50133600  | -2.44650400 | 1.17868900  |
| C                                                         | 0.07646100  | 0.32359500  | 2.52676000  | H  | 4.29351200  | -1.85704400 | 2.32746000  |
| C                                                         | -1.10668000 | 0.32418100  | 0.34296400  | C  | 1.92212800  | -3.33834000 | 1.84578800  |
| C                                                         | -2.43463800 | 0.49520600  | -0.41850700 | H  | 2.28498000  | -2.73173200 | 2.67813200  |
| C                                                         | -2.61559400 | 1.98243100  | -0.80533700 | H  | 2.33223600  | -4.34832700 | 1.97497700  |
| H                                                         | -5.25205100 | -1.25409200 | -0.32784000 | H  | 0.83460600  | -3.40884300 | 1.91624700  |
| H                                                         | -4.77163500 | 1.99676300  | -0.63959600 | C  | 0.37957600  | -3.62998500 | -0.96562900 |
| H                                                         | -5.01595500 | 4.33863400  | -1.34997200 | H  | -0.26853800 | -3.03403600 | -1.61382300 |
| H                                                         | -3.01827900 | 5.68180700  | -1.97498900 | H  | -0.15752100 | -3.81289900 | -0.03407000 |
| H                                                         | -0.75974900 | 4.63758600  | -1.87639700 | H  | 0.55208500  | -4.59654800 | -1.45373000 |
| H                                                         | -0.50089700 | 2.30578000  | -1.15109500 | O  | 2.11896600  | 1.19916300  | -0.08198500 |
| H                                                         | -0.70281000 | 0.05072100  | -2.77659700 | C  | 3.28326900  | 1.82664700  | 0.07154200  |
| H                                                         | -1.40180400 | -1.27667800 | -4.76447100 | O  | 4.34562200  | 1.24165300  | 0.24973000  |
| H                                                         | -3.63478900 | -2.35110200 | -4.81781900 | C  | 3.17646600  | 3.36202500  | 0.00136300  |
| H                                                         | -5.21440200 | -2.08463100 | -2.91987200 | C  | 2.10894100  | 3.85307800  | 1.00250300  |
| H                                                         | -4.12524800 | 0.71471800  | 0.98200100  | H  | 1.12322200  | 3.44316900  | 0.77218100  |
| H                                                         | -2.75845500 | -2.67815900 | -0.05799600 | H  | 2.04605100  | 4.94573600  | 0.96705300  |

|                                                           |             |             |             |                                                           |             |             |             |
|-----------------------------------------------------------|-------------|-------------|-------------|-----------------------------------------------------------|-------------|-------------|-------------|
| H                                                         | 2.36653700  | 3.56804300  | 2.02820300  | H                                                         | 2.34269900  | -0.15964300 | 2.50950900  |
| C                                                         | 4.54099800  | 3.98459100  | 0.33598900  | H                                                         | 4.20161400  | -1.79836000 | 2.74221000  |
| H                                                         | 4.47615800  | 5.07550900  | 0.27068000  | H                                                         | 4.70800900  | -3.37637500 | 0.89889600  |
| H                                                         | 5.31526000  | 3.64217400  | -0.35485200 | H                                                         | 3.37889500  | -3.33523800 | -1.20359000 |
| H                                                         | 4.86046800  | 3.72041900  | 1.34785400  | H                                                         | -0.16231000 | -0.00412100 | -1.95891900 |
| C                                                         | 2.76055300  | 3.74609400  | -1.43757200 | H                                                         | -0.22815600 | -2.70377500 | 0.73802800  |
| H                                                         | 3.50697100  | 3.41578200  | -2.16821100 | H                                                         | -2.18356900 | -4.17197300 | 1.05198500  |
| H                                                         | 2.67475700  | 4.83455200  | -1.52027000 | H                                                         | -4.19301500 | -3.91481100 | -0.39127400 |
| H                                                         | 1.79741800  | 3.30290200  | -1.70514900 | H                                                         | -4.22061900 | -2.16454800 | -2.16030200 |
| <b>P</b>                                                  |             |             |             | H                                                         | -2.26015200 | -0.68928300 | -2.47165400 |
| Sum of electronic and thermal Free Energies: -1171.144813 |             |             |             | H                                                         | -1.02774100 | 1.94869400  | -1.08255000 |
| C                                                         | -1.63315300 | 1.13577500  | 0.83028300  | H                                                         | -3.13401800 | 3.15931100  | -1.46680900 |
| C                                                         | 1.85272900  | 1.65888200  | -1.62470200 | H                                                         | -4.95461200 | 3.07548500  | 0.22207700  |
| C                                                         | 2.48968900  | 2.85820800  | -1.94923700 | H                                                         | -4.64431800 | 1.75907600  | 2.31028200  |
| C                                                         | 2.63726200  | 3.86327200  | -0.99313900 | H                                                         | -2.50654500 | 0.53150600  | 2.68963100  |
| C                                                         | 2.15183400  | 3.65312900  | 0.29812300  | N                                                         | 1.27513800  | -1.50830400 | -1.61047300 |
| C                                                         | 1.51684200  | 2.45496000  | 0.62427900  | O                                                         | -0.23170500 | -0.07815700 | 2.28750000  |
| C                                                         | 1.81992900  | -0.82895600 | 0.53262200  | <b>iso-7</b>                                              |             |             |             |
| C                                                         | 2.57349400  | -0.84215700 | 1.70022100  | Sum of electronic and thermal Free Energies: -1669.813016 |             |             |             |
| C                                                         | 3.61544700  | -1.76989800 | 1.82886300  | C                                                         | -1.38634    | -0.61852    | 1.23329     |
| C                                                         | 3.89906900  | -2.65921400 | 0.78922400  | C                                                         | -2.2041     | -1.35794    | 2.11823     |
| C                                                         | 3.15538900  | -2.64517500 | -0.39485200 | H                                                         | -3.12223    | -1.80098    | 1.74772     |
| C                                                         | -1.81786700 | 1.88196900  | -0.34444900 | C                                                         | -1.81789    | -1.49677    | 3.43572     |
| C                                                         | 2.11673600  | -1.72033800 | -0.50780100 | C                                                         | -0.61157    | -0.91832    | 3.88946     |
| C                                                         | 0.11203500  | -0.70522100 | -1.16581600 | H                                                         | -0.33062    | -1.01914    | 4.93308     |
| C                                                         | -1.10269600 | -1.58774000 | -0.89372400 | C                                                         | 0.21227     | -0.22025    | 3.0302      |
| C                                                         | -1.09570400 | -2.58338600 | 0.09779100  | C                                                         | -0.14013    | -0.03155    | 1.6621      |
| C                                                         | -2.20316000 | -3.41174400 | 0.27627300  | H                                                         | 1.13284     | 0.21271     | 3.39479     |
| C                                                         | -3.33259600 | -3.26710900 | -0.53319600 | C                                                         | 2.36011     | -1.99732    | -0.99215    |
| C                                                         | -3.34836700 | -2.28563700 | -1.52415700 | C                                                         | 1.9572      | -2.90339    | 0.04674     |
| C                                                         | -2.24040200 | -1.45514500 | -1.70024300 | C                                                         | 0.75698     | -3.59708    | -0.38715    |
| C                                                         | -3.00765200 | 2.57744500  | -0.55841400 | C                                                         | 0.37907     | -3.05805    | -1.64886    |
| C                                                         | -4.02835300 | 2.53394100  | 0.39280100  | C                                                         | 1.35769     | -2.04334    | -2.02888    |
| C                                                         | -3.85334800 | 1.79605100  | 1.56677600  | Rh                                                        | 0.35254     | -1.33877    | -0.20978    |
| C                                                         | -2.66411300 | 1.10756800  | 1.78450900  | H                                                         | -2.44371    | -2.05414    | 4.12557     |
| C                                                         | -0.38873000 | 0.35433900  | 1.15632400  | C                                                         | -0.7781     | -3.48914    | -2.49718    |
| C                                                         | 0.69355200  | 0.10288200  | 0.07261700  | H                                                         | -1.21836    | -2.64432    | -3.03407    |
| C                                                         | 1.34524000  | 1.44350800  | -0.33411700 | H                                                         | -0.44369    | -4.21359    | -3.2501     |
| H                                                         | 1.02266900  | -2.33843200 | -2.13491400 | H                                                         | -1.56366    | -3.96527    | -1.90606    |
| H                                                         | 1.78322700  | 0.87519700  | -2.37148700 | C                                                         | 1.42856     | -1.36092    | -3.36068    |
| H                                                         | 2.87722900  | 3.00116600  | -2.95420800 | H                                                         | 1.93264     | -2.00712    | -4.09132    |
| H                                                         | 3.13071400  | 4.79642100  | -1.24890300 | H                                                         | 0.43492     | -1.13613    | -3.75704    |
| H                                                         | 2.26531000  | 4.42246900  | 1.05672100  | H                                                         | 1.99326     | -0.42795    | -3.30524    |
| H                                                         | 1.15372300  | 2.30934900  | 1.63743800  | C                                                         | 0.06765     | -4.69507    | 0.36465     |

|   |          |          |          |                                                           |          |          |          |
|---|----------|----------|----------|-----------------------------------------------------------|----------|----------|----------|
| H | -0.97021 | -4.81566 | 0.04702  | C                                                         | -6.08274 | 1.15111  | -1.25234 |
| H | 0.57842  | -5.65062 | 0.19228  | H                                                         | -4.64673 | 0.13996  | -2.48873 |
| H | 0.07243  | -4.51377 | 1.44236  | C                                                         | -6.35595 | 1.66349  | 0.01841  |
| C | 2.71834  | -3.15769 | 1.31088  | H                                                         | -5.61027 | 1.96985  | 2.02161  |
| H | 2.11139  | -3.69109 | 2.04503  | H                                                         | -6.81426 | 1.24331  | -2.04893 |
| H | 3.60384  | -3.77137 | 1.10303  | H                                                         | -7.30439 | 2.15468  | 0.21427  |
| H | 3.04754  | -2.21631 | 1.75453  | <b>iso-8</b>                                              |          |          |          |
| C | 3.65322  | -1.24649 | -1.03304 | Sum of electronic and thermal Free Energies: -2016.691769 |          |          |          |
| H | 3.59838  | -0.36259 | -1.67208 | C                                                         | 1.62087  | 0.08423  | 1.33256  |
| H | 3.96569  | -0.92857 | -0.03669 | C                                                         | 2.10535  | 0.71455  | 2.48034  |
| H | 4.43604  | -1.90159 | -1.43727 | H                                                         | 3.10365  | 1.13831  | 2.4425   |
| N | -1.60921 | -0.56361 | -0.15608 | C                                                         | 1.34795  | 0.81875  | 3.65157  |
| O | 2.65493  | 0.13149  | 1.75272  | C                                                         | 0.06967  | 0.28965  | 3.68522  |
| C | 0.64089  | 0.70583  | 0.62427  | H                                                         | -0.52637 | 0.33278  | 4.59061  |
| C | 2.09915  | 0.90728  | 0.96766  | C                                                         | -0.44352 | -0.36515 | 2.55497  |
| C | 2.91531  | 2.05403  | 0.44454  | C                                                         | 0.30176  | -0.51277 | 1.33411  |
| C | 3.85263  | 2.59831  | 1.34145  | H                                                         | -1.35754 | -0.92696 | 2.6626   |
| C | 2.86835  | 2.55303  | -0.86745 | C                                                         | -3.54346 | 0.60966  | 1.05841  |
| C | 4.68879  | 3.6398   | 0.95104  | C                                                         | -3.08922 | 1.82843  | 1.7611   |
| H | 3.91053  | 2.19409  | 2.34665  | C                                                         | -2.63321 | 2.7368   | 0.79701  |
| C | 3.72968  | 3.57538  | -1.26562 | C                                                         | -2.82929 | 2.11821  | -0.52742 |
| H | 2.17351  | 2.14112  | -1.58621 | C                                                         | -3.49913 | 0.86854  | -0.36366 |
| C | 4.63101  | 4.13047  | -0.35641 | Rh                                                        | -1.44641 | 0.74826  | 0.55727  |
| H | 5.39053  | 4.06347  | 1.66274  | H                                                         | 1.77345  | 1.30512  | 4.52388  |
| H | 3.69113  | 3.94236  | -2.28731 | C                                                         | -2.54523 | 2.80336  | -1.8231  |
| H | 5.28791  | 4.9381   | -0.66519 | H                                                         | -2.47147 | 2.09203  | -2.64856 |
| C | -0.08979 | 1.8512   | -0.05094 | H                                                         | -3.37258 | 3.48942  | -2.05239 |
| C | -0.59656 | 2.89269  | 0.74097  | H                                                         | -1.62952 | 3.3965   | -1.7713  |
| C | -0.27574 | 1.93002  | -1.43962 | C                                                         | -4.1427  | 0.05346  | -1.43884 |
| C | -1.25525 | 3.98166  | 0.16357  | H                                                         | -5.18049 | 0.38734  | -1.57082 |
| H | -0.46517 | 2.85838  | 1.81962  | H                                                         | -3.63667 | 0.17411  | -2.39868 |
| C | -0.93182 | 3.01444  | -2.02034 | H                                                         | -4.16238 | -1.00975 | -1.19937 |
| H | 0.09305  | 1.12204  | -2.06548 | C                                                         | -2.09253 | 4.11237  | 1.02463  |
| C | -1.42472 | 4.04722  | -1.21908 | H                                                         | -1.27782 | 4.34178  | 0.33405  |
| H | -1.63269 | 4.77859  | 0.79698  | H                                                         | -2.88597 | 4.85342  | 0.85941  |
| H | -1.06094 | 3.05322  | -3.09854 | H                                                         | -1.73386 | 4.23848  | 2.0486   |
| H | -1.93646 | 4.89234  | -1.66967 | C                                                         | -3.15659 | 2.04229  | 3.24042  |
| C | -2.63871 | -0.23416 | -0.8569  | H                                                         | -2.37841 | 2.72465  | 3.58802  |
| H | -2.52568 | -0.41231 | -1.92656 | H                                                         | -4.12667 | 2.48313  | 3.50406  |
| C | -3.90113 | 0.39558  | -0.47525 | H                                                         | -3.06558 | 1.10538  | 3.79332  |
| C | -4.18467 | 0.932    | 0.80033  | C                                                         | -4.23014 | -0.5495  | 1.70722  |
| C | -4.86464 | 0.52664  | -1.49641 | H                                                         | -4.177   | -1.45005 | 1.09266  |
| C | -5.40218 | 1.55744  | 1.0373   | H                                                         | -3.80999 | -0.78108 | 2.68829  |
| H | -3.45334 | 0.87639  | 1.59524  | H                                                         | -5.29104 | -0.30597 | 1.85492  |

|   |          |          |          |                                                           |          |          |          |
|---|----------|----------|----------|-----------------------------------------------------------|----------|----------|----------|
| N | 2.41254  | 0.20161  | 0.17317  | C                                                         | 3.607    | 3.69233  | -0.29828 |
| O | -1.36132 | -2.76315 | 1.63538  | H                                                         | 3.59162  | 2.6778   | 0.1103   |
| C | -0.38285 | -1.13957 | 0.16609  | H                                                         | 4.63994  | 3.92217  | -0.57712 |
| C | -1.28349 | -2.33791 | 0.48397  | H                                                         | 3.31351  | 4.38694  | 0.49521  |
| C | -2.08445 | -3.05655 | -0.57682 | C                                                         | 2.80714  | 5.27369  | -2.09015 |
| C | -2.75252 | -4.22084 | -0.14679 | H                                                         | 3.83942  | 5.47108  | -2.39472 |
| C | -2.22266 | -2.67006 | -1.92201 | H                                                         | 2.1564   | 5.41626  | -2.95596 |
| C | -3.52675 | -4.97141 | -1.02582 | H                                                         | 2.52125  | 6.012    | -1.33717 |
| H | -2.643   | -4.52176 | 0.8885   | C                                                         | 3.10388  | 2.82935  | -2.63162 |
| C | -3.00207 | -3.42247 | -2.80116 | H                                                         | 2.48222  | 2.94353  | -3.52556 |
| H | -1.72001 | -1.79004 | -2.29656 | H                                                         | 4.14342  | 3.00657  | -2.92439 |
| C | -3.65376 | -4.5749  | -2.3596  | H                                                         | 3.02239  | 1.7906   | -2.29618 |
| H | -4.02737 | -5.86795 | -0.67294 | <b>iso-TS<sub>89</sub></b>                                |          |          |          |
| H | -3.09254 | -3.10936 | -3.83706 | Sum of electronic and thermal Free Energies: -2016.690537 |          |          |          |
| H | -4.25256 | -5.16156 | -3.04998 | C                                                         | -1.62465 | -0.35729 | 1.32518  |
| C | 0.38251  | -1.30006 | -1.12871 | C                                                         | -2.24241 | -1.07503 | 2.35445  |
| C | 1.11635  | -2.48094 | -1.33103 | H                                                         | -3.13538 | -1.64597 | 2.12325  |
| C | 0.3645   | -0.34568 | -2.15609 | C                                                         | -1.72108 | -1.07866 | 3.64399  |
| C | 1.82681  | -2.69062 | -2.51263 | C                                                         | -0.55587 | -0.35837 | 3.90124  |
| H | 1.13688  | -3.24038 | -0.55443 | H                                                         | -0.13687 | -0.33281 | 4.90252  |
| C | 1.06894  | -0.55587 | -3.34272 | C                                                         | 0.07794  | 0.34536  | 2.88287  |
| H | -0.20294 | 0.56959  | -2.02328 | C                                                         | -0.40911 | 0.38183  | 1.54362  |
| C | 1.80573  | -1.72805 | -3.52432 | H                                                         | 0.94974  | 0.93601  | 3.10803  |
| H | 2.38916  | -3.60997 | -2.64581 | C                                                         | 3.62315  | -0.10102 | 0.42343  |
| H | 1.03686  | 0.19414  | -4.12777 | C                                                         | 3.25962  | -0.86691 | 1.57859  |
| H | 2.34943  | -1.89467 | -4.44932 | C                                                         | 2.96681  | -2.24145 | 1.15974  |
| C | 3.50277  | -0.43483 | -0.0708  | C                                                         | 3.0701   | -2.28789 | -0.24362 |
| H | 4.03301  | -0.09138 | -0.96233 | C                                                         | 3.38007  | -0.93872 | -0.72579 |
| C | 4.16667  | -1.55168 | 0.61241  | Rh                                                        | 1.45293  | -0.72716 | 0.27701  |
| C | 3.58996  | -2.33452 | 1.63295  | H                                                         | -2.21668 | -1.64138 | 4.42866  |
| C | 5.4684   | -1.86375 | 0.17309  | C                                                         | 2.98208  | -3.48857 | -1.1291  |
| C | 4.30548  | -3.38663 | 2.19606  | H                                                         | 2.45523  | -3.26587 | -2.06056 |
| H | 2.58476  | -2.13284 | 1.98038  | H                                                         | 3.99775  | -3.80411 | -1.40144 |
| C | 6.18566  | -2.90892 | 0.7476   | H                                                         | 2.47827  | -4.32167 | -0.64262 |
| H | 5.91636  | -1.27599 | -0.62395 | C                                                         | 3.68757  | -0.5959  | -2.14906 |
| C | 5.60382  | -3.6727  | 1.76138  | H                                                         | 4.70388  | -0.92686 | -2.40146 |
| H | 3.85002  | -3.98782 | 2.97672  | H                                                         | 3.00191  | -1.0932  | -2.83935 |
| H | 7.19036  | -3.1316  | 0.40272  | H                                                         | 3.63701  | 0.47974  | -2.32476 |
| H | 6.15673  | -4.49305 | 2.2088   | C                                                         | 2.64969  | -3.3726  | 2.0846   |
| H | 1.67729  | 1.72784  | -0.53848 | H                                                         | 2.09879  | -4.15996 | 1.57088  |
| O | 0.92936  | 2.37684  | -0.60534 | H                                                         | 3.57418  | -3.79802 | 2.49607  |
| C | 1.23435  | 3.5854   | -1.13226 | H                                                         | 2.04077  | -3.03426 | 2.92683  |
| O | 0.34594  | 4.40438  | -1.26224 | C                                                         | 3.42793  | -0.42051 | 2.99544  |
| C | 2.69507  | 3.84326  | -1.53782 | H                                                         | 2.74189  | -0.93853 | 3.66819  |

|   |          |          |          |                                                           |          |          |          |
|---|----------|----------|----------|-----------------------------------------------------------|----------|----------|----------|
| H | 4.45014  | -0.6521  | 3.32371  | H                                                         | -7.75393 | 1.92801  | 1.60635  |
| H | 3.27717  | 0.65517  | 3.09431  | H                                                         | -1.17064 | -1.12778 | -0.69436 |
| C | 4.31091  | 1.22542  | 0.43851  | O                                                         | -0.17833 | -1.6778  | -0.97747 |
| H | 4.24514  | 1.73738  | -0.52144 | C                                                         | -0.34856 | -3.02959 | -0.90992 |
| H | 3.91219  | 1.88805  | 1.20927  | O                                                         | 0.16527  | -3.69021 | -0.03116 |
| H | 5.37401  | 1.05816  | 0.65706  | C                                                         | -1.23106 | -3.66774 | -2.00465 |
| N | -2.13848 | -0.53639 | 0.01193  | C                                                         | -2.55749 | -4.09415 | -1.32963 |
| O | 1.74426  | 2.34306  | 1.96142  | H                                                         | -3.11483 | -3.23367 | -0.94513 |
| C | 0.288    | 1.14628  | 0.4358   | H                                                         | -3.19382 | -4.60615 | -2.05816 |
| C | 1.26706  | 2.23545  | 0.82713  | H                                                         | -2.3668  | -4.77654 | -0.49741 |
| C | 1.70131  | 3.28425  | -0.17002 | C                                                         | -0.50363 | -4.93114 | -2.51484 |
| C | 1.92952  | 4.57109  | 0.34669  | H                                                         | -1.1384  | -5.45788 | -3.23387 |
| C | 1.98274  | 3.04499  | -1.52434 | H                                                         | 0.43239  | -4.67573 | -3.02303 |
| C | 2.39051  | 5.59795  | -0.47414 | H                                                         | -0.2729  | -5.60824 | -1.6902  |
| H | 1.74018  | 4.75241  | 1.39905  | C                                                         | -1.5056  | -2.71921 | -3.18333 |
| C | 2.47206  | 4.06588  | -2.33865 | H                                                         | -0.57768 | -2.40748 | -3.6719  |
| H | 1.83265  | 2.05884  | -1.94365 | H                                                         | -2.1214  | -3.23102 | -3.92954 |
| C | 2.66654  | 5.34774  | -1.81984 | H                                                         | -2.03646 | -1.81227 | -2.8801  |
| H | 2.54245  | 6.5908   | -0.06168 | <b>iso-9</b>                                              |          |          |          |
| H | 2.6969   | 3.86142  | -3.38136 | Sum of electronic and thermal Free Energies: -2016.729801 |          |          |          |
| H | 3.03432  | 6.14447  | -2.45942 | C                                                         | 1.35808  | 1.47072  | 1.24638  |
| C | -0.61851 | 1.61633  | -0.69619 | C                                                         | 1.24175  | 2.50262  | 2.18304  |
| C | -1.55351 | 2.62352  | -0.40324 | H                                                         | 0.94525  | 3.49115  | 1.84675  |
| C | -0.54552 | 1.15064  | -2.01628 | C                                                         | 1.51404  | 2.25838  | 3.52428  |
| C | -2.40472 | 3.1276   | -1.38619 | C                                                         | 1.91263  | 0.97644  | 3.90933  |
| H | -1.61244 | 3.0191   | 0.60771  | H                                                         | 2.14166  | 0.76678  | 4.94947  |
| C | -1.39592 | 1.65084  | -3.00319 | C                                                         | 2.01056  | -0.04423 | 2.96846  |
| H | 0.16938  | 0.3753   | -2.26785 | C                                                         | 1.71124  | 0.14794  | 1.60286  |
| C | -2.33343 | 2.63778  | -2.69191 | H                                                         | 2.32285  | -1.02682 | 3.2976   |
| H | -3.11896 | 3.9056   | -1.13326 | C                                                         | -2.89251 | -2.50688 | 0.2728   |
| H | -1.32178 | 1.27227  | -4.01879 | C                                                         | -2.63539 | -1.94942 | 1.55782  |
| H | -2.99239 | 3.03003  | -3.46061 | C                                                         | -3.50912 | -0.78494 | 1.72967  |
| C | -3.34682 | -0.33965 | -0.40271 | C                                                         | -4.32584 | -0.65784 | 0.55694  |
| H | -3.52542 | -0.69304 | -1.41883 | C                                                         | -3.9037  | -1.67508 | -0.3681  |
| C | -4.50486 | 0.29418  | 0.22169  | Rh                                                        | -2.15284 | -0.43366 | 0.05564  |
| C | -4.4595  | 1.11336  | 1.36928  | H                                                         | 1.42131  | 3.05642  | 4.25292  |
| C | -5.74238 | 0.09709  | -0.42492 | C                                                         | -5.44175 | 0.31952  | 0.36125  |
| C | -5.62344 | 1.69856  | 1.85368  | H                                                         | -5.67436 | 0.45734  | -0.69692 |
| H | -3.51895 | 1.30145  | 1.87027  | H                                                         | -6.34772 | -0.05851 | 0.85158  |
| C | -6.90743 | 0.67023  | 0.07502  | H                                                         | -5.18971 | 1.29153  | 0.78634  |
| H | -5.78472 | -0.5145  | -1.32229 | C                                                         | -4.46186 | -1.9183  | -1.73291 |
| C | -6.8489  | 1.47244  | 1.21633  | H                                                         | -5.25475 | -2.67568 | -1.67654 |
| H | -5.57895 | 2.33443  | 2.73218  | H                                                         | -4.89607 | -1.01321 | -2.1613  |
| H | -7.85433 | 0.5004   | -0.42704 | H                                                         | -3.69651 | -2.2943  | -2.41608 |

|   |          |          |          |
|---|----------|----------|----------|
| C | -3.60122 | 0.07673  | 2.94568  |
| H | -3.64216 | 1.12817  | 2.65325  |
| H | -4.51284 | -0.17064 | 3.50481  |
| H | -2.74937 | -0.07241 | 3.61147  |
| C | -1.67756 | -2.47048 | 2.58146  |
| H | -1.24038 | -1.65953 | 3.16845  |
| H | -2.19905 | -3.14197 | 3.27495  |
| H | -0.86314 | -3.03112 | 2.11852  |
| C | -2.31028 | -3.7566  | -0.30803 |
| H | -2.118   | -3.65803 | -1.37846 |
| H | -1.36897 | -4.0274  | 0.1705   |
| H | -3.01396 | -4.58688 | -0.16699 |
| N | 1.08088  | 1.8182   | -0.12531 |
| O | -0.19199 | -0.36867 | -0.3904  |
| C | 1.82866  | -0.98074 | 0.63351  |
| C | 0.8323   | -1.22291 | -0.28194 |
| C | 0.81731  | -2.34532 | -1.26986 |
| C | 1.28366  | -3.63724 | -0.97366 |
| C | 0.26231  | -2.11079 | -2.54131 |
| C | 1.20455  | -4.65788 | -1.92132 |
| H | 1.70842  | -3.84712 | 0.00062  |
| C | 0.19404  | -3.12939 | -3.49174 |
| H | -0.10603 | -1.11827 | -2.77947 |
| C | 0.66268  | -4.40929 | -3.18409 |
| H | 1.56754  | -5.65041 | -1.67068 |
| H | -0.22084 | -2.9234  | -4.4745  |
| H | 0.60832  | -5.20443 | -3.9218  |
| C | 3.1288   | -1.7347  | 0.62536  |
| C | 3.51288  | -2.63723 | 1.63224  |
| C | 4.03243  | -1.49822 | -0.42485 |
| C | 4.76175  | -3.26176 | 1.59972  |
| H | 2.81975  | -2.88514 | 2.43472  |
| C | 5.27403  | -2.13388 | -0.46608 |
| H | 3.74859  | -0.81027 | -1.22145 |
| C | 5.64862  | -3.01035 | 0.55312  |
| H | 5.03742  | -3.95656 | 2.39182  |
| H | 5.94991  | -1.93801 | -1.29376 |
| H | 6.61828  | -3.50148 | 0.52863  |
| C | 1.8872   | 2.33757  | -1.00219 |
| H | 1.41352  | 2.51543  | -1.96559 |
| C | 3.28414  | 2.70559  | -0.91951 |
| C | 4.12414  | 2.51518  | 0.20247  |
| C | 3.82952  | 3.27576  | -2.09549 |
| C | 5.46175  | 2.88451  | 0.13314  |

|   |          |         |          |
|---|----------|---------|----------|
| H | 3.73562  | 2.08156 | 1.11291  |
| C | 5.16706  | 3.64408 | -2.15102 |
| H | 3.19237  | 3.42518 | -2.96495 |
| C | 5.98508  | 3.44581 | -1.03491 |
| H | 6.10239  | 2.73224 | 0.99441  |
| H | 5.57294  | 4.08041 | -3.05819 |
| H | 7.03192  | 3.72976 | -1.074   |
| H | 0.14306  | 1.51709 | -0.45566 |
| O | -1.89652 | 1.52106 | -0.62609 |
| C | -2.63208 | 2.52937 | -0.19779 |
| O | -3.27565 | 2.51513 | 0.84853  |
| C | -2.68695 | 3.74873 | -1.15136 |
| C | -1.32539 | 4.01148 | -1.81854 |
| H | -0.99382 | 3.13945 | -2.38798 |
| H | -1.40215 | 4.85945 | -2.5072  |
| H | -0.56118 | 4.26178 | -1.07475 |
| C | -3.14511 | 4.9936  | -0.37327 |
| H | -3.25453 | 5.8456  | -1.05199 |
| H | -4.10204 | 4.81648 | 0.12034  |
| H | -2.42074 | 5.26695 | 0.40031  |
| C | -3.72693 | 3.40124 | -2.24419 |
| H | -4.71103 | 3.21118 | -1.80447 |
| H | -3.82873 | 4.23776 | -2.94369 |
| H | -3.42133 | 2.51604 | -2.81117 |

**iso-TS<sub>910</sub>**

Sum of electronic and thermal Free Energies: -2016.713227

|    |             |             |             |
|----|-------------|-------------|-------------|
| C  | 2.46141900  | -1.06381400 | -2.72631500 |
| C  | 2.47537700  | -1.76642200 | -3.93021200 |
| H  | 2.69640400  | -1.25074700 | -4.85934200 |
| C  | 2.18531800  | -3.13118200 | -3.91687800 |
| C  | 1.88199000  | -3.77361000 | -2.71354000 |
| H  | 1.66801500  | -4.83815100 | -2.70686600 |
| C  | 1.87045200  | -3.05466200 | -1.51342600 |
| C  | 2.15223000  | -1.68500300 | -1.50023500 |
| H  | 1.66945800  | -3.56821900 | -0.57765400 |
| C  | -2.43949300 | -2.65587100 | 0.49007600  |
| C  | -2.97534400 | -2.35044000 | -0.80455400 |
| C  | -4.08411700 | -1.40540100 | -0.63851300 |
| C  | -4.17568800 | -1.08371800 | 0.74753900  |
| C  | -3.13680200 | -1.83945900 | 1.44419400  |
| Rh | -2.17485900 | -0.50235500 | 0.00549600  |
| H  | 2.19402600  | -3.69174900 | -4.84630200 |
| C  | -5.21055100 | -0.22510500 | 1.39877500  |
| H  | -4.85323200 | 0.18227300  | 2.34698300  |



|   |             |             |             |                                                           |             |             |             |
|---|-------------|-------------|-------------|-----------------------------------------------------------|-------------|-------------|-------------|
| H | -6.10266000 | -0.82831100 | 1.61151100  | C                                                         | 2.21948800  | 0.93039600  | -1.53038800 |
| H | -5.48529500 | 0.60734600  | 0.75199400  | H                                                         | 1.13278500  | 0.87916200  | -1.50618900 |
| C | -2.90748800 | -1.82885500 | 2.91894300  | C                                                         | 2.84179400  | 2.12444600  | -0.96641100 |
| H | -3.58012800 | -2.55656900 | 3.39248300  | C                                                         | 2.01781500  | 3.09860900  | -0.37127300 |
| H | -3.12165000 | -0.85088900 | 3.35324000  | C                                                         | 4.23392500  | 2.33243500  | -0.99236800 |
| H | -1.88259400 | -2.10134500 | 3.17573200  | C                                                         | 2.56792100  | 4.26205700  | 0.15756100  |
| C | -4.99170300 | -0.92774200 | -1.72236800 | H                                                         | 0.94408600  | 2.93945700  | -0.34608600 |
| H | -5.27733600 | 0.11059500  | -1.55370100 | C                                                         | 4.78036400  | 3.50045800  | -0.46718700 |
| H | -5.89502900 | -1.55170100 | -1.73786100 | H                                                         | 4.89613500  | 1.57242000  | -1.39685600 |
| H | -4.52136000 | -1.00272900 | -2.70480100 | C                                                         | 3.94999600  | 4.46759500  | 0.10536700  |
| C | -2.53006300 | -2.94441200 | -2.10082700 | H                                                         | 1.92163600  | 5.01245500  | 0.60207500  |
| H | -2.72661000 | -2.27198700 | -2.93811000 | H                                                         | 5.85465100  | 3.65276100  | -0.49442000 |
| H | -3.07826200 | -3.87702900 | -2.28768000 | H                                                         | 4.37935000  | 5.37736200  | 0.51372600  |
| H | -1.46274100 | -3.17483400 | -2.09161500 | H                                                         | 2.54226823  | 0.77614694  | -3.48094782 |
| C | -1.35521200 | -3.64113400 | 0.79579500  | O                                                         | -2.01395200 | 1.47295100  | -0.36584800 |
| H | -0.74884400 | -3.32170100 | 1.64604800  | C                                                         | -3.04952300 | 2.26737800  | -0.61118400 |
| H | -0.69407300 | -3.78570600 | -0.06007800 | O                                                         | -4.21324400 | 1.88295600  | -0.63985300 |
| H | -1.79626900 | -4.61367900 | 1.04637700  | C                                                         | -2.66421400 | 3.73888400  | -0.87394500 |
| N | 2.78168900  | 0.30878600  | -2.61415700 | C                                                         | -1.73098100 | 3.79626800  | -2.10325700 |
| O | -0.07308900 | -0.49035700 | -0.33839300 | H                                                         | -0.82423500 | 3.20715300  | -1.94684300 |
| C | 2.23218000  | -0.84151600 | -0.25335300 | H                                                         | -1.44045500 | 4.83288100  | -2.30354100 |
| C | 0.96738600  | -0.59638100 | 0.39762600  | H                                                         | -2.23485900 | 3.41395000  | -2.99750100 |
| C | 0.79833100  | -0.41466400 | 1.87047500  | C                                                         | -3.93427600 | 4.56058000  | -1.14515700 |
| C | 1.34690900  | -1.33083000 | 2.78319700  | H                                                         | -3.66728700 | 5.60520800  | -1.33597900 |
| C | 0.00708600  | 0.64387500  | 2.35030600  | H                                                         | -4.61793900 | 4.52978300  | -0.29280800 |
| C | 1.10204700  | -1.19352700 | 4.14950300  | H                                                         | -4.47432800 | 4.17837300  | -2.01497000 |
| H | 1.96779800  | -2.14429800 | 2.42336600  | C                                                         | -1.93886500 | 4.29710500  | 0.36987100  |
| C | -0.20503900 | 0.79673300  | 3.72109400  | H                                                         | -2.58777900 | 4.26883600  | 1.25213400  |
| H | -0.42009800 | 1.35339600  | 1.64856100  | H                                                         | -1.65666200 | 5.34153900  | 0.20001400  |
| C | 0.33611600  | -0.12378400 | 4.62215000  | H                                                         | -1.03263700 | 3.72892000  | 0.59653600  |
| H | 1.52284400  | -1.91186000 | 4.84647700  | <b>iso-10</b>                                             |             |             |             |
| H | -0.78982500 | 1.63627900  | 4.08548100  | Sum of electronic and thermal Free Energies: -2016.729656 |             |             |             |
| H | 0.16703000  | -0.00616600 | 5.68832300  | C                                                         | 2.93677600  | -1.68842000 | -2.17806800 |
| C | 3.53060000  | -0.87115400 | 0.48950800  | C                                                         | 3.21451100  | -2.81078500 | -2.96392600 |
| C | 4.51838300  | -1.82986400 | 0.19063700  | H                                                         | 3.52550500  | -2.70156700 | -3.99856000 |
| C | 3.84302800  | 0.10355200  | 1.46061300  | C                                                         | 3.08579200  | -4.07558900 | -2.38512200 |
| C | 5.74053700  | -1.84225300 | 0.86416100  | C                                                         | 2.69010200  | -4.22578700 | -1.05226900 |
| H | 4.32971800  | -2.58030800 | -0.56865000 | H                                                         | 2.60459700  | -5.21653800 | -0.61789200 |
| C | 5.06252300  | 0.08774900  | 2.13302800  | C                                                         | 2.41807100  | -3.09410800 | -0.27080000 |
| H | 3.12736300  | 0.88472900  | 1.68881300  | C                                                         | 2.53247100  | -1.82744600 | -0.83665800 |
| C | 6.01798400  | -0.88878200 | 1.84358800  | H                                                         | 2.12126800  | -3.21866500 | 0.76602900  |
| H | 6.47694500  | -2.60187100 | 0.61842400  | C                                                         | -2.34481000 | -2.77749700 | -0.13895700 |
| H | 5.27015900  | 0.84955800  | 2.87880100  | C                                                         | -2.57671900 | -2.26192100 | -1.45179700 |
| H | 6.96937500  | -0.89860000 | 2.36661600  | C                                                         | -3.75656100 | -1.39277700 | -1.40831100 |

|    |             |             |             |                                                           |             |             |             |
|----|-------------|-------------|-------------|-----------------------------------------------------------|-------------|-------------|-------------|
| C  | -4.22111500 | -1.35013600 | -0.05451300 | C                                                         | 4.54840100  | 1.69128600  | 2.09566800  |
| C  | -3.32491800 | -2.18191700 | 0.73741200  | H                                                         | 2.52397500  | 1.78031300  | 1.40139400  |
| Rh | -2.17865100 | -0.55150400 | -0.14492800 | C                                                         | 5.76407000  | 1.00509700  | 2.05500600  |
| H  | 3.29878000  | -4.95580200 | -2.98455000 | H                                                         | 6.81649600  | -0.68683200 | 1.23344500  |
| C  | -5.46813700 | -0.68359200 | 0.42831700  | H                                                         | 4.45152500  | 2.59659700  | 2.68735000  |
| H  | -5.45864500 | -0.54125700 | 1.51065600  | H                                                         | 6.61725000  | 1.37033900  | 2.61861200  |
| H  | -6.33134100 | -1.31613700 | 0.18426000  | C                                                         | 2.19666200  | 0.42395300  | -1.59328000 |
| H  | -5.59421900 | 0.28947500  | -0.04712500 | H                                                         | 1.14247900  | 0.31974900  | -1.87569900 |
| C  | -3.44864200 | -2.43484600 | 2.20321400  | C                                                         | 2.52922600  | 1.89624700  | -1.56299100 |
| H  | -4.05431300 | -3.33646200 | 2.36487800  | C                                                         | 1.50673400  | 2.82071600  | -1.30366700 |
| H  | -3.94447800 | -1.60780600 | 2.71423100  | C                                                         | 3.82636800  | 2.36592600  | -1.80393300 |
| H  | -2.47598300 | -2.59865000 | 2.67108100  | C                                                         | 1.77991500  | 4.18856900  | -1.26948300 |
| C  | -4.39942100 | -0.71464900 | -2.57066800 | H                                                         | 0.49302700  | 2.46592600  | -1.13048300 |
| H  | -4.63810600 | 0.31988600  | -2.31250400 | C                                                         | 4.09619300  | 3.73475000  | -1.78123700 |
| H  | -5.33171200 | -1.23562800 | -2.82460000 | H                                                         | 4.61924000  | 1.65396200  | -2.00814600 |
| H  | -3.75900700 | -0.72507700 | -3.45409700 | C                                                         | 3.07627900  | 4.64891600  | -1.51073300 |
| C  | -1.78777300 | -2.58449000 | -2.67848900 | H                                                         | 0.97962900  | 4.89462300  | -1.06800300 |
| H  | -1.75688800 | -1.73864900 | -3.36889600 | H                                                         | 5.10511500  | 4.08729400  | -1.97399400 |
| H  | -2.25812900 | -3.42417500 | -3.20628600 | H                                                         | 3.28830400  | 5.71382200  | -1.49497600 |
| H  | -0.76275900 | -2.87169100 | -2.43728000 | H                                                         | 2.97598700  | -0.09069700 | -3.49514500 |
| C  | -1.28121300 | -3.75121300 | 0.26118900  | O                                                         | -2.16756200 | 1.43614400  | 0.11246700  |
| H  | -1.00028100 | -3.63151200 | 1.30957200  | C                                                         | -3.17620000 | 2.25237300  | -0.16952900 |
| H  | -0.37944700 | -3.64518600 | -0.34524900 | O                                                         | -4.19442400 | 1.89227800  | -0.75209300 |
| H  | -1.65152800 | -4.77591200 | 0.13310800  | C                                                         | -2.95550800 | 3.72686000  | 0.22814500  |
| N  | 3.03643600  | -0.34811100 | -2.51808400 | C                                                         | -2.56276900 | 4.47374600  | -1.07009500 |
| O  | -0.03148600 | -0.28961700 | -0.14111300 | H                                                         | -1.62452300 | 4.09033200  | -1.48556300 |
| C  | 2.34734400  | -0.42118800 | -0.22901900 | H                                                         | -2.42785700 | 5.53943300  | -0.85768200 |
| C  | 1.00643200  | -0.41153900 | 0.53677900  | H                                                         | -3.34266300 | 4.37189700  | -1.82979200 |
| C  | 0.89772100  | -0.58743300 | 2.00646000  | C                                                         | -4.28783300 | 4.29024400  | 0.76098300  |
| C  | 1.84005800  | -1.30933600 | 2.76288700  | H                                                         | -4.18202100 | 5.35893400  | 0.97268800  |
| C  | -0.21460900 | -0.01858000 | 2.66041900  | H                                                         | -4.58557000 | 3.79305900  | 1.69076400  |
| C  | 1.64318900  | -1.50105400 | 4.12878100  | H                                                         | -5.08852000 | 4.15511700  | 0.03138100  |
| H  | 2.72504000  | -1.71649000 | 2.29151200  | C                                                         | -1.85006000 | 3.89192600  | 1.28414700  |
| C  | -0.38559000 | -0.18478800 | 4.03206100  | H                                                         | -2.09388000 | 3.35364100  | 2.20628900  |
| H  | -0.90555500 | 0.60193900  | 2.09857500  | H                                                         | -1.74049400 | 4.95121900  | 1.53894700  |
| C  | 0.53492400  | -0.93873900 | 4.76637600  | H                                                         | -0.88548800 | 3.52647300  | 0.92364700  |
| H  | 2.36737600  | -2.07396200 | 4.69896700  | <b>iso-p</b>                                              |             |             |             |
| H  | -1.22681900 | 0.28511900  | 4.53247500  | Sum of electronic and thermal Free Energies: -1171.148602 |             |             |             |
| H  | 0.39885100  | -1.07160200 | 5.83544200  | C                                                         | -0.21668500 | 2.78865100  | -0.37540200 |
| C  | 3.54831500  | 0.05236100  | 0.59979900  | C                                                         | 0.10869600  | 4.14393300  | -0.29753100 |
| C  | 4.77595600  | -0.62115000 | 0.55741100  | H                                                         | -0.65261900 | 4.90624600  | -0.43742200 |
| C  | 3.45491600  | 1.22226500  | 1.37073200  | C                                                         | 1.43785600  | 4.49414200  | -0.04594100 |
| C  | 5.87440300  | -0.14868200 | 1.28023300  | C                                                         | 2.41786400  | 3.51436300  | 0.12488800  |
| H  | 4.88006700  | -1.52031200 | -0.03935600 | H                                                         | 3.44849100  | 3.80121900  | 0.30883200  |

|   |             |             |             |                                                           |             |             |             |
|---|-------------|-------------|-------------|-----------------------------------------------------------|-------------|-------------|-------------|
| C | 2.07839800  | 2.15630100  | 0.05252400  | <b>TS12(Cl)</b>                                           |             |             |             |
| C | 0.75969900  | 1.78968100  | -0.20058400 | Sum of electronic and thermal Free Energies: -1591.207376 |             |             |             |
| H | 2.85094000  | 1.40668900  | 0.17879200  | C                                                         | 0.68806900  | 2.11574600  | -0.17369200 |
| H | 1.70934800  | 5.54481500  | 0.00840500  | C                                                         | 1.08205400  | 3.39111800  | -0.57849800 |
| N | -1.47051900 | 2.22081400  | -0.58876700 | H                                                         | 2.06906000  | 3.57768200  | -0.98819100 |
| O | 0.51774300  | -0.77677500 | -2.35592300 | C                                                         | 0.16163000  | 4.43632400  | -0.48528100 |
| C | 0.07533500  | 0.41340000  | -0.30749900 | C                                                         | -1.12925100 | 4.20438300  | -0.00296300 |
| C | 0.89536300  | -0.55265900 | -1.21356600 | H                                                         | -1.83306300 | 5.02669600  | 0.07880400  |
| C | 2.17253000  | -1.19912200 | -0.74072000 | C                                                         | -1.51370700 | 2.91368100  | 0.36337200  |
| C | 2.68811800  | -1.11438500 | 0.56391700  | C                                                         | -0.61911000 | 1.83432100  | 0.27866700  |
| C | 2.88610400  | -1.94178000 | -1.69925700 | H                                                         | -0.54325200 | 1.11961700  | 1.60136300  |
| C | 3.88619100  | -1.74922600 | 0.89301200  | H                                                         | -2.51673900 | 2.74581400  | 0.74375100  |
| H | 2.15549900  | -0.56628900 | 1.32994700  | C                                                         | -2.15370300 | -2.24170800 | 0.19693900  |
| C | 4.07987900  | -2.57459800 | -1.36903700 | C                                                         | -3.06971700 | -1.12028700 | 0.43674200  |
| H | 2.47955000  | -2.00384600 | -2.70232900 | C                                                         | -3.08619200 | -0.29781400 | -0.73129900 |
| C | 4.58444700  | -2.48004800 | -0.06904800 | C                                                         | -2.08747400 | -0.81679400 | -1.64543800 |
| H | 4.26933500  | -1.67619500 | 1.90656100  | C                                                         | -1.56755400 | -2.06362900 | -1.07686900 |
| H | 4.61844500  | -3.14085400 | -2.12338400 | Rh                                                        | -1.04503300 | -0.26002500 | 0.15109000  |
| H | 5.51574000  | -2.97460200 | 0.19248200  | H                                                         | 0.45595900  | 5.43300500  | -0.79782500 |
| C | -0.25437200 | -0.21320600 | 1.05663800  | C                                                         | -1.81828400 | -0.32177800 | -3.03158700 |
| C | -0.25409800 | 0.54339400  | 2.23582500  | H                                                         | -0.79394300 | -0.53741000 | -3.34276400 |
| C | -0.62435400 | -1.56549000 | 1.13349200  | H                                                         | -2.49250600 | -0.81723500 | -3.74213600 |
| C | -0.60007700 | -0.03819900 | 3.45801300  | H                                                         | -1.98159000 | 0.75464200  | -3.11423200 |
| H | 0.02350500  | 1.59108800  | 2.20048700  | C                                                         | -0.55964800 | -2.93945400 | -1.75197300 |
| C | -0.96528800 | -2.14794300 | 2.35293800  | H                                                         | -1.02690500 | -3.47603800 | -2.58630000 |
| H | -0.65277100 | -2.16896700 | 0.23120700  | H                                                         | 0.26523200  | -2.34764300 | -2.15866600 |
| C | -0.95261700 | -1.38606000 | 3.52295600  | H                                                         | -0.14294500 | -3.68058000 | -1.06823200 |
| H | -0.59164800 | 0.56752900  | 4.36004300  | C                                                         | -4.00211600 | 0.85306900  | -1.00437000 |
| H | -1.24398500 | -3.19729800 | 2.38696600  | H                                                         | -3.51589300 | 1.63101200  | -1.59594300 |
| H | -1.21738100 | -1.83859100 | 4.47434600  | H                                                         | -4.87007500 | 0.49669900  | -1.57315300 |
| C | -1.25685800 | 0.84640600  | -1.07677500 | H                                                         | -4.37922100 | 1.30301000  | -0.08396800 |
| H | -0.97357400 | 0.86130700  | -2.13600600 | C                                                         | -3.94019500 | -0.98106200 | 1.64647300  |
| C | -2.48867400 | -0.02227700 | -0.93478900 | H                                                         | -4.30268600 | 0.04090500  | 1.77198700  |
| C | -2.70870300 | -1.06438100 | -1.84716300 | H                                                         | -4.81504700 | -1.63693100 | 1.55352700  |
| C | -3.43386400 | 0.20259300  | 0.07474700  | H                                                         | -3.40686000 | -1.26342300 | 2.55656900  |
| C | -3.84207100 | -1.87169700 | -1.74387100 | C                                                         | -1.91544900 | -3.35602800 | 1.16620700  |
| H | -1.98066500 | -1.24001500 | -2.63335700 | H                                                         | -1.02977300 | -3.93874100 | 0.90857000  |
| C | -4.57022600 | -0.60104000 | 0.17390500  | H                                                         | -1.78861000 | -2.97807700 | 2.18396700  |
| H | -3.27040700 | 1.01308600  | 0.77712000  | H                                                         | -2.77588000 | -4.03665400 | 1.17159500  |
| C | -4.77761700 | -1.64207600 | -0.73302100 | N                                                         | 1.58435900  | 0.99054100  | -0.20120100 |
| H | -3.99818700 | -2.67496600 | -2.45881200 | O                                                         | 1.00134100  | -0.20543000 | -0.34006800 |
| H | -5.29470400 | -0.41326500 | 0.96173500  | C                                                         | 2.88570900  | 1.10661000  | -0.06248500 |
| H | -5.66378000 | -2.26602200 | -0.65589600 | H                                                         | 3.21868300  | 2.12793000  | 0.07641500  |
| H | -2.12930700 | 2.76537100  | -1.13283400 | C                                                         | 3.89518500  | 0.08130800  | -0.06316100 |

|    |             |             |             |   |          |          |          |
|----|-------------|-------------|-------------|---|----------|----------|----------|
| C  | 5.22718400  | 0.53489100  | 0.09910300  | H | -5.01382 | 0.45843  | 2.10842  |
| C  | 3.65763300  | -1.30663600 | -0.20270300 | H | -3.4929  | -0.03537 | 2.86512  |
| C  | 6.28548900  | -0.36228000 | 0.11821800  | C | -3.53921 | -2.47602 | 1.25335  |
| H  | 5.42090000  | 1.59833600  | 0.21014400  | H | -3.13247 | -3.40945 | 0.86072  |
| C  | 4.72664300  | -2.19497700 | -0.18001500 | H | -3.09908 | -2.29979 | 2.23826  |
| H  | 2.64457600  | -1.66144500 | -0.32048300 | H | -4.61942 | -2.61076 | 1.39401  |
| C  | 6.03653900  | -1.73139100 | -0.02175500 | N | 1.50488  | -0.45714 | -0.59398 |
| H  | 7.30085000  | -0.00058100 | 0.24251700  | O | 0.34311  | -1.10491 | -0.82546 |
| H  | 4.54001900  | -3.25900800 | -0.28552500 | C | 2.59489  | -1.18451 | -0.58834 |
| H  | 6.86252900  | -2.43581700 | -0.00651500 | H | 2.38325  | -2.20786 | -0.87916 |
| Cl | -0.33764700 | 0.12937200  | 2.71369800  | C | 3.96817  | -0.86839 | -0.24023 |

#### iso-TS12(Cl)

Sum of electronic and thermal Free Energies: -1591.205726

|    |          |          |          |
|----|----------|----------|----------|
| C  | 1.34578  | 0.96086  | -0.39863 |
| C  | 2.25892  | 1.88778  | -0.89906 |
| H  | 3.13875  | 1.56945  | -1.44631 |
| C  | 2.01327  | 3.2448   | -0.68198 |
| C  | 0.87728  | 3.65595  | 0.022    |
| H  | 0.70797  | 4.71256  | 0.20569  |
| C  | -0.04757 | 2.7108   | 0.47108  |
| C  | 0.15065  | 1.33938  | 0.24818  |
| H  | 0.00995  | 0.49642  | 1.52673  |
| H  | -0.93146 | 3.04418  | 1.00634  |
| C  | -3.28853 | -1.32435 | 0.33241  |
| C  | -3.43057 | 0.08486  | 0.71834  |
| C  | -3.1713  | 0.88951  | -0.43352 |
| C  | -2.72961 | 0.0036   | -1.49541 |
| C  | -2.87566 | -1.37459 | -1.01937 |
| Rh | -1.31795 | -0.21959 | 0.10396  |
| H  | 2.7131   | 3.98073  | -1.06506 |
| C  | -2.40601 | 0.39471  | -2.90279 |
| H  | -1.66707 | -0.28069 | -3.34007 |
| H  | -3.31092 | 0.34666  | -3.52196 |
| H  | -2.01494 | 1.41243  | -2.96009 |
| C  | -2.58319 | -2.58877 | -1.84456 |
| H  | -3.36346 | -2.72716 | -2.60258 |
| H  | -1.62584 | -2.48797 | -2.36466 |
| H  | -2.54266 | -3.4929  | -1.23485 |
| C  | -3.36897 | 2.36684  | -0.55909 |
| H  | -2.63929 | 2.82187  | -1.23192 |
| H  | -4.36708 | 2.56304  | -0.97005 |
| H  | -3.31123 | 2.87104  | 0.40723  |
| C  | -3.92202 | 0.55518  | 2.05248  |
| H  | -3.67246 | 1.60309  | 2.2293   |

|    |          |          |          |
|----|----------|----------|----------|
| H  | -5.01382 | 0.45843  | 2.10842  |
| H  | -3.4929  | -0.03537 | 2.86512  |
| C  | -3.53921 | -2.47602 | 1.25335  |
| H  | -3.13247 | -3.40945 | 0.86072  |
| H  | -3.09908 | -2.29979 | 2.23826  |
| H  | -4.61942 | -2.61076 | 1.39401  |
| N  | 1.50488  | -0.45714 | -0.59398 |
| O  | 0.34311  | -1.10491 | -0.82546 |
| C  | 2.59489  | -1.18451 | -0.58834 |
| H  | 2.38325  | -2.20786 | -0.87916 |
| C  | 3.96817  | -0.86839 | -0.24023 |
| C  | 4.94259  | -1.7554  | -0.74721 |
| C  | 4.37756  | 0.16452  | 0.63372  |
| C  | 6.28844  | -1.58619 | -0.43805 |
| H  | 4.63442  | -2.57404 | -1.38834 |
| C  | 5.72244  | 0.31614  | 0.94935  |
| H  | 3.64853  | 0.82873  | 1.08088  |
| C  | 6.68235  | -0.54799 | 0.40224  |
| H  | 7.02651  | -2.26981 | -0.84878 |
| H  | 6.02712  | 1.10614  | 1.63025  |
| H  | 7.7311   | -0.41727 | 0.65333  |
| Cl | -0.138   | -0.60549 | 2.51303  |

#### TS12(Ir)

Sum of electronic and thermal Free Energies: -1472.471487

|   |          |          |          |
|---|----------|----------|----------|
| C | -0.55908 | -1.84653 | 1.43546  |
| C | -0.70321 | -3.10391 | 2.01401  |
| H | -1.52692 | -3.75709 | 1.7452   |
| C | 0.26249  | -3.53108 | 2.93007  |
| C | 1.34888  | -2.71124 | 3.25151  |
| H | 2.08037  | -3.04523 | 3.98064  |
| C | 1.48629  | -1.46672 | 2.63825  |
| C | 0.54557  | -1.00602 | 1.69631  |
| H | 0.26527  | 0.18161  | 1.80779  |
| H | 2.31073  | -0.81564 | 2.91286  |
| C | 2.71852  | 0.89926  | -1.40926 |
| C | 3.23802  | -0.08662 | -0.49827 |
| C | 2.69979  | -1.39184 | -0.89139 |
| C | 1.82981  | -1.18875 | -2.00786 |
| C | 1.80345  | 0.23807  | -2.31887 |
| O | 0.20589  | 1.87426  | 0.09813  |
| C | -0.32074 | 2.20755  | 1.22768  |
| O | -0.37279 | 1.44208  | 2.21863  |
| C | -0.91276 | 3.62336  | 1.34297  |
| H | 0.16342  | -4.50918 | 3.38993  |

|   |          |          |          |                                                           |          |          |          |
|---|----------|----------|----------|-----------------------------------------------------------|----------|----------|----------|
| C | 1.0596   | -2.23395 | -2.752   | H                                                         | -7.28344 | -1.46318 | -0.293   |
| H | 0.03091  | -1.91019 | -2.93017 | H                                                         | -4.7315  | 0.6663   | -3.0265  |
| H | 1.52823  | -2.41984 | -3.72567 | H                                                         | -6.99719 | -0.06536 | -2.33012 |
| H | 1.02982  | -3.17932 | -2.2078  | Ir                                                        | 1.04876  | -0.0105  | -0.29338 |
| C | 1.09262  | 0.87175  | -3.47498 | <b>TS89(CI)</b>                                           |          |          |          |
| H | 0.8264   | 1.9082   | -3.25815 | Sum of electronic and thermal Free Energies: -1591.205726 |          |          |          |
| H | 1.73455  | 0.86654  | -4.36463 | C                                                         | 1.34578  | 0.96086  | -0.39863 |
| H | 0.1761   | 0.33182  | -3.72337 | C                                                         | 2.25892  | 1.88778  | -0.89906 |
| C | 3.10158  | -2.71152 | -0.30762 | H                                                         | 3.13875  | 1.56945  | -1.44631 |
| H | 2.31774  | -3.46235 | -0.42491 | C                                                         | 2.01327  | 3.2448   | -0.68198 |
| H | 4.00027  | -3.08218 | -0.81513 | C                                                         | 0.87728  | 3.65595  | 0.022    |
| H | 3.32925  | -2.63171 | 0.75635  | H                                                         | 0.70797  | 4.71256  | 0.20569  |
| C | 4.29047  | 0.14708  | 0.54302  | C                                                         | -0.04757 | 2.7108   | 0.47108  |
| H | 4.25326  | -0.6083  | 1.32968  | C                                                         | 0.15065  | 1.33938  | 0.24818  |
| H | 5.286    | 0.09748  | 0.08521  | H                                                         | 0.00995  | 0.49642  | 1.52673  |
| H | 4.18632  | 1.12875  | 1.00993  | H                                                         | -0.93146 | 3.04418  | 1.00634  |
| C | 3.03763  | 2.36039  | -1.41555 | C                                                         | -3.28853 | -1.32435 | 0.33241  |
| H | 3.78491  | 2.57122  | -2.19033 | C                                                         | -3.43057 | 0.08486  | 0.71834  |
| H | 2.14815  | 2.95738  | -1.62813 | C                                                         | -3.1713  | 0.88951  | -0.43352 |
| H | 3.44382  | 2.6879   | -0.45652 | C                                                         | -2.72961 | 0.0036   | -1.49541 |
| N | -1.52021 | -1.32998 | 0.49783  | C                                                         | -2.87566 | -1.37459 | -1.01937 |
| O | -1.02437 | -0.57308 | -0.48709 | Rh                                                        | -1.31795 | -0.21959 | 0.10396  |
| C | -0.19453 | 4.33897  | 2.50894  | H                                                         | 2.7131   | 3.98073  | -1.06506 |
| H | 0.87321  | 4.4677   | 2.30001  | C                                                         | -2.40601 | 0.39471  | -2.90279 |
| H | -0.62824 | 5.33337  | 2.65418  | H                                                         | -1.66707 | -0.28069 | -3.34007 |
| H | -0.29812 | 3.77503  | 3.43858  | H                                                         | -3.31092 | 0.34666  | -3.52196 |
| C | -2.41372 | 3.46473  | 1.6777   | H                                                         | -2.01494 | 1.41243  | -2.96009 |
| H | -2.86828 | 4.45194  | 1.80757  | C                                                         | -2.58319 | -2.58877 | -1.84456 |
| H | -2.94939 | 2.95196  | 0.87093  | H                                                         | -3.36346 | -2.72716 | -2.60258 |
| H | -2.54914 | 2.89497  | 2.59999  | H                                                         | -1.62584 | -2.48797 | -2.36466 |
| C | -0.7423  | 4.42196  | 0.04228  | H                                                         | -2.54266 | -3.4929  | -1.23485 |
| H | -1.23696 | 3.92938  | -0.79928 | C                                                         | -3.36897 | 2.36684  | -0.55909 |
| H | -1.1841  | 5.41624  | 0.16265  | H                                                         | -2.63929 | 2.82187  | -1.23192 |
| H | 0.31302  | 4.5513   | -0.21387 | H                                                         | -4.36708 | 2.56304  | -0.97005 |
| C | -2.81008 | -1.5496  | 0.61312  | H                                                         | -3.31123 | 2.87104  | 0.40723  |
| H | -3.07405 | -2.13678 | 1.48456  | C                                                         | -3.92202 | 0.55518  | 2.05248  |
| C | -3.8824  | -1.10713 | -0.24101 | H                                                         | -3.67246 | 1.60309  | 2.2293   |
| C | -5.1826  | -1.51386 | 0.14493  | H                                                         | -5.01382 | 0.45843  | 2.10842  |
| C | -3.7313  | -0.31049 | -1.40067 | H                                                         | -3.4929  | -0.03537 | 2.86512  |
| C | -6.29315 | -1.14352 | -0.60059 | C                                                         | -3.53921 | -2.47602 | 1.25335  |
| H | -5.31052 | -2.12286 | 1.03589  | H                                                         | -3.13247 | -3.40945 | 0.86072  |
| C | -4.85261 | 0.05397  | -2.13837 | H                                                         | -3.09908 | -2.29979 | 2.23826  |
| H | -2.74454 | 0.01116  | -1.69953 | H                                                         | -4.61942 | -2.61076 | 1.39401  |
| C | -6.1299  | -0.35747 | -1.74592 | N                                                         | 1.50488  | -0.45714 | -0.59398 |

|    |         |          |          |
|----|---------|----------|----------|
| O  | 0.34311 | -1.10491 | -0.82546 |
| C  | 2.59489 | -1.18451 | -0.58834 |
| H  | 2.38325 | -2.20786 | -0.87916 |
| C  | 3.96817 | -0.86839 | -0.24023 |
| C  | 4.94259 | -1.7554  | -0.74721 |
| C  | 4.37756 | 0.16452  | 0.63372  |
| C  | 6.28844 | -1.58619 | -0.43805 |
| H  | 4.63442 | -2.57404 | -1.38834 |
| C  | 5.72244 | 0.31614  | 0.94935  |
| H  | 3.64853 | 0.82873  | 1.08088  |
| C  | 6.68235 | -0.54799 | 0.40224  |
| H  | 7.02651 | -2.26981 | -0.84878 |
| H  | 6.02712 | 1.10614  | 1.63025  |
| H  | 7.7311  | -0.41727 | 0.65333  |
| Cl | -0.138  | -0.60549 | 2.51303  |
